# Supplementary material for: ERK1 indicates good prognosis and inhibits breast cancer progression by suppressing YAP1 signaling
Source: Aging (Albany NY). 2019 Dec 18;11(24):12295–314. doi: 10.18632/aging.102572 (PMC6949071; doi:10.18632/aging.102572)
Supplement: Supplementary Table 1 [file aging-11-102572-s001..xlsx]

## Sheet: Sheet1
GeneID	GeneName	Locus	ctrl_FPKM	ERK1_FPKM	log2(ERK1/ctrl)	up-or-down	p_value
SLPI	SLPI	chr20:45252238-45254564	7.91043	0.11556	-6.09704	down	0.000181018
EIF3CL	EIF3CL	chr16:28379578-28426454	114.758	1.80119	-5.9935	down	2.22e-16
LINC01351	LINC01351	chr1:190478259-190481394	1.80205	0.054462	-5.04824	down	0.00488558
ZNF32-AS1	ZNF32-AS1	chr10:43628816-43674699	29.8811	1.07745	-4.79355	down	0.000184434
COMMD3-BMI1	COMMD3-BMI1	chr10:22316382-22331485	3.71464	0.148667	-4.64306	down	0.00137742
CCL20	CCL20	chr2:227813841-227817564	7.296	0.308487	-4.56382	down	0.00126598
SCHIP1	SCHIP1	chr3:159069251-159897366	8.83363	0.629018	-3.81183	down	0.00382694
MFSD2A	MFSD2A	chr1:39955111-39969968	2.46515	0.17742	-3.79643	down	0.00450354
TXNIP	TXNIP	chr1:145992441-145996631	59.6798	4.71147	-3.66299	down	3.47e-05
ISY1-RAB43	ISY1-RAB43	chr3:129087568-129161230	1.69903	0.138318	-3.61865	down	0.00990608
PTAFR	PTAFR	chr1:28147165-28193936	1.33865	0.113124	-3.5648	down	0.00634601
BEST4	BEST4	chr1:44783584-44787754	1.13536	0.101193	-3.48797	down	0.00757178
CNFN	CNFN	chr19:42387018-42390292	13.0504	1.19733	-3.4462	down	0.0097853
CCL2	CCL2	chr17:34255276-34257201	1.68599	0.160911	-3.38926	down	0.0125187
IFI44	IFI44	chr1:78649791-78664078	5.12116	0.492759	-3.37752	down	0.00567595
PRC1-AS1	PRC1-AS1	chr15:90966037-90994651	18.8972	1.82485	-3.37232	down	0.000683649
MAPK3	MAPK3	chr16:30114104-30123309	26.4443	2.58678	-3.35373	down	1.27e-05
IFITM1	IFITM1	chr11:313990-315272	117.932	12.5345	-3.23397	down	0.000402768
SLAMF9	SLAMF9	chr1:159951491-159954254	1.30329	0.147203	-3.14627	down	0.0164103
IFITM3	IFITM3	chr11:319672-320914	69.6586	8.31754	-3.06607	down	0.00106971
CITED1	CITED1	chrX:72301637-72307187	3.86929	0.480571	-3.00925	down	0.0159279
S100A11	S100A11	chr1:152032505-152037035	605.725	77.5006	-2.96638	down	0.000672049
LOX	LOX	chr5:122063194-122078360	1.66416	0.219303	-2.9238	down	0.0107738
TDH	TDH	chr8:11339636-11466767	1.4795	0.198	-2.90154	down	0.0422877
PCP4	PCP4	chr21:39867420-39929397	14.1318	1.89669	-2.89739	down	0.0124476
OAS1	OAS1	chr12:112906933-112919907	26.0929	3.6687	-2.83031	down	1.7e-05
IFIT3	IFIT3	chr10:89327818-89340968	5.20844	0.784424	-2.73115	down	0.00543416
COX20	COX20	chr1:244835336-244846941	16.1557	2.43513	-2.72998	down	0.00404269
EIF4EBP2	EIF4EBP2	chr10:70404104-70428618	37.065	5.64911	-2.71396	down	0.00163266
LRG1	LRG1	chr19:4537214-4540024	2.40198	0.366935	-2.71063	down	0.0376679
RPS28	RPS28	chr19:8321499-8322396	1619.35	255.373	-2.66474	down	0.0027184
ACOX2	ACOX2	chr3:58505135-58537202	6.09554	0.980759	-2.63578	down	0.012303
OAS3	OAS3	chr12:112938432-112973249	88.4139	14.303	-2.62795	down	0.00339265
LINC01224	LINC01224	chr19:23399235-23416074	3.03523	0.497303	-2.60961	down	0.0145049
KIAA0825	KIAA0825	chr5:94150850-94618604	3.73275	0.627315	-2.57298	down	0.0229358
IL15	IL15	chr4:141636595-141733987	2.88747	0.49626	-2.54064	down	0.0412132
GINS2	GINS2	chr16:85677673-85688982	133.833	23.745	-2.49474	down	0.00385005
OAS2	OAS2	chr12:112978468-113011723	49.0242	8.7405	-2.4877	down	2.28e-05
TMEM145	TMEM145	chr19:42313324-42325062	3.61909	0.660323	-2.45438	down	0.0434617
CHCHD5	CHCHD5	chr2:112584436-112589040	35.4393	6.51592	-2.44331	down	0.00554377
ATP11C	ATP11C	chrX:139726345-139832288	8.10894	1.52299	-2.41261	down	0.00879317
SESTD1	SESTD1	chr2:179101691-179264623	1.67075	0.314907	-2.4075	down	0.0217274
S100A8	S100A8	chr1:153390031-153391188	10.5225	1.98401	-2.40699	down	0.0463282
BNIP3	BNIP3	chr10:131967682-131982013	270.05	51.4252	-2.39268	down	0.00609623
ISG15	ISG15	chr1:1013466-1014539	43.4646	8.65958	-2.32747	down	0.0176064
ATOX1	ATOX1	chr5:151742821-151758649	92.5937	18.7577	-2.30343	down	0.0132199
POLR2K	POLR2K	chr8:100150610-100154002	176.634	35.7865	-2.30328	down	0.00705064
BIRC3	BIRC3	chr11:102317449-102339403	8.58538	1.74871	-2.29559	down	0.0141717
IFIT1	IFIT1	chr10:89392545-89406487	13.5415	2.75909	-2.29512	down	0.00102221
PARP9	PARP9	chr3:122527910-122575202	20.4113	4.23076	-2.27038	down	6.97e-05
IFITM2	IFITM2	chr11:308106-309410	76.1054	16.0946	-2.24142	down	0.0134261
SUSD4	SUSD4	chr1:223220818-223364202	3.441	0.728338	-2.24015	down	0.0324771
MGST2	MGST2	chr4:139665767-140154079	14.8326	3.18204	-2.22075	down	0.0279279
IL1RAP	IL1RAP	chr3:190514050-190657197	16.1909	3.48919	-2.21422	down	6.14e-05
ARSB	ARSB	chr5:78777210-78986534	1.6115	0.350631	-2.20038	down	0.0348441
MX1	MX1	chr21:41420557-41459214	80.0429	17.5076	-2.19279	down	0.000794992
HAUS8	HAUS8	chr19:17049760-17075533	9.98327	2.19348	-2.18629	down	0.0226804
KIAA0101	KIAA0101	chr15:64365011-64387687	48.1142	10.6182	-2.17993	down	0.0114389
LSM3	LSM3	chr3:14178727-14198369	144.598	32.1634	-2.16856	down	0.0122423
FBXO5	FBXO5	chr6:152970522-152983605	27.1153	6.05309	-2.16336	down	0.00291812
POC5	POC5	chr5:75674198-75717488	17.5584	3.97009	-2.14491	down	0.00618288
ACER2	ACER2	chr9:19408926-19452502	5.70365	1.3342	-2.09591	down	0.0400394
PRIM1	PRIM1	chr12:56731579-56752362	89.7895	21.706	-2.04845	down	0.0171855
LINC00467	LINC00467	chr1:211382754-211432535	19.5673	4.77438	-2.03506	down	0.0424217
UBE2C	UBE2C	chr20:45812575-45816957	175.435	42.8202	-2.03457	down	0.014351
ATP5L	ATP5L	chr11:118359580-118418815	109.024	27.4026	-1.99227	down	0.0203716
GTF2A2	GTF2A2	chr15:59638061-59657538	24.5415	6.1966	-1.98567	down	0.0309427
CDKN3	CDKN3	chr14:54396954-54420216	134.379	34.7692	-1.95043	down	0.0229054
TMC5	TMC5	chr16:19410538-19499112	1.33365	0.347639	-1.93972	down	0.0344717
ORC1	ORC1	chr1:52372828-52404471	7.53508	1.96985	-1.93554	down	0.0128192
PFN1	PFN1	chr17:4945649-4949086	559.358	146.269	-1.93515	down	0.0327135
ALOX15	ALOX15	chr17:4630918-4641665	8.72838	2.28919	-1.93087	down	0.0447272
HIST1H2BH	HIST1H2BH	chr6:26251650-26252075	122.264	32.1253	-1.92821	down	0.0340469
HIST1H4D	HIST1H4D	chr6:26188709-26189076	268.197	70.6123	-1.9253	down	0.0297627
GLRX3	GLRX3	chr10:130136374-130180382	66.628	17.5651	-1.92341	down	0.00500843
SLC39A4	SLC39A4	chr8:144412413-144416895	60.3404	16.0582	-1.90981	down	0.0489126
CDKN1A	CDKN1A	chr6:36676459-36687339	37.4164	10.0325	-1.89899	down	0.0068112
EXOSC9	EXOSC9	chr4:121801316-121823933	17.5104	4.70219	-1.89681	down	0.0440089
STMN3	STMN3	chr20:63639704-63653610	2.93056	0.788107	-1.89472	down	0.040662
FAM111B	FAM111B	chr11:59107184-59127416	19.6277	5.30786	-1.88669	down	0.00904928
MPV17	MPV17	chr2:27309491-27323102	114.433	31.0132	-1.88355	down	0.0292931
SNRPD1	SNRPD1	chr18:21612268-21630245	81.8597	22.2465	-1.87957	down	0.0303935
RPL28	RPL28	chr19:55385931-55392083	246.709	67.3956	-1.87208	down	0.000669495
TYMS	TYMS	chr18:596997-712662	20.1432	5.51266	-1.86947	down	0.0439012
MGP	MGP	chr12:14881180-14885919	1183.49	326.083	-1.85974	down	0.0473783
POLE3	POLE3	chr9:113407238-113429684	131.731	36.5729	-1.84875	down	0.00017785
IL18	IL18	chr11:112143250-112164117	32.3371	8.99231	-1.84643	down	0.0233019
LDHA	LDHA	chr11:18394388-18408218	1017.45	282.967	-1.84626	down	0.0481644
AURKA	AURKA	chr20:56369388-56392295	107.31	29.9394	-1.84166	down	2.39e-09
NCEH1	NCEH1	chr3:172630644-172711218	22.5375	6.29776	-1.83942	down	0.0229917
MYCBP	MYCBP	chr1:38862489-38881626	26.4265	7.39924	-1.83654	down	0.0346656
C4orf46	C4orf46	chr4:158666674-158708713	15.2734	4.27832	-1.8359	down	0.0272296
CMTM7	CMTM7	chr3:32391670-32454841	13.0299	3.66312	-1.83068	down	0.0349494
SUMO1	SUMO1	chr2:202206179-202238599	123.594	34.8268	-1.82733	down	0.0240119
UBB	UBB	chr17:16380792-16382745	499.25	141.637	-1.81757	down	0.00114647
RHNO1	RHNO1	chr12:2836815-2889525	41.5875	11.8733	-1.80842	down	0.000217264
SNCG	SNCG	chr10:86958530-86963260	81.2635	23.2376	-1.80615	down	0.0392126
E2F7	E2F7	chr12:77021245-77065580	9.70165	2.79892	-1.79336	down	0.0419029
C21orf59	C21orf59	chr21:32601673-32612608	36.457	10.5221	-1.79277	down	0.0195122
KPNA2	KPNA2	chr17:68035731-68046854	369.273	107.241	-1.78383	down	0.0447606
MXRA7	MXRA7	chr17:76671927-76711005	35.6262	10.3473	-1.78369	down	0.011759
HIST1H2BF	HIST1H2BF	chr6:26199558-26199988	177.668	51.9659	-1.77354	down	0.0450281
EME1	EME1	chr17:50373219-50397553	22.635	6.63499	-1.77039	down	0.0438517
EXO1	EXO1	chr1:241848190-241889939	24.6778	7.24052	-1.76905	down	0.0014342
CFAP20	CFAP20	chr16:58113592-58129392	33.7617	9.91762	-1.76732	down	0.0481774
NKX3-1	NKX3-1	chr8:23678692-23682937	6.4217	1.9356	-1.73017	down	0.0248127
REEP3	REEP3	chr10:63521362-63625123	31.107	9.43285	-1.72147	down	0.0438838
TMEM14C	TMEM14C	chr6:10722914-10731129	153.554	47.9765	-1.67835	down	0.0272723
GNG10	GNG10	chr9:111631351-111670246	53.2471	16.6523	-1.67698	down	0.00508427
P2RX5	P2RX5,P2RX5-TAX1BP3	chr17:3636467-3696404	3.81533	1.19872	-1.67031	down	0.0139586
EIF2AK2	EIF2AK2	chr2:37105140-37157047	20.8821	6.64827	-1.65121	down	0.0183563
PIK3R3	PIK3R3	chr1:46040139-46185962	14.1953	4.53012	-1.64779	down	0.000254417
CDK2	CDK2	chr12:55966768-55972789	82.8558	26.929	-1.62144	down	0.0488163
ATP5J2	ATP5J2	chr7:99408977-99466201	91.2764	29.8982	-1.61018	down	0.0104828
KIAA0895	KIAA0895	chr7:36324149-36453791	13.1048	4.31064	-1.60412	down	0.000334748
ZNF331	ZNF331	chr19:53520922-53580269	9.15457	3.02926	-1.59553	down	0.0321414
STON1	STON1	chr2:48529924-48776517	3.94448	1.31216	-1.58789	down	0.0383043
CDC25C	CDC25C	chr5:138285264-138349729	9.59348	3.19468	-1.58638	down	0.0125099
PPP2R1B	PPP2R1B	chr11:111602390-111766445	32.3933	10.9086	-1.57023	down	0.00933554
SGOL1	SGOL1	chr3:20160592-20186427	11.7321	3.95428	-1.56897	down	0.00108867
SLC26A6	SLC26A6	chr3:48625722-48635493	19.8183	6.69475	-1.56573	down	0.00366163
SMC2	SMC2	chr9:104094259-104141419	30.3428	10.263	-1.5639	down	0.002086
PAQR4	PAQR4	chr16:2969244-2980539	40.0639	13.558	-1.56316	down	0.00772503
C18orf32	C18orf32	chr18:49481177-49492565	34.7228	11.7576	-1.56229	down	0.0447073
DGUOK	DGUOK	chr2:73926825-73981439	58.4895	19.8992	-1.55547	down	0.0136105
TMEM189	TMEM189,TMEM189-UBE2V1	chr20:50081123-50153798	15.6756	5.34106	-1.55332	down	0.015449
RWDD1	RWDD1	chr6:116571366-116593601	13.6739	4.67422	-1.54862	down	0.0178475
SNHG16	SNHG16	chr17:76557763-76565348	216.389	74.2437	-1.54328	down	0.00205886
RTN4	RTN4	chr2:54972190-55050598	134.497	46.2285	-1.54071	down	0.00764824
RAP1A	RAP1A	chr1:111619782-111716695	16.049	5.54568	-1.53305	down	0.0141771
ANP32E	ANP32E	chr1:150218416-150236156	114.112	39.7826	-1.52024	down	0.0168034
UBXN11	UBXN11	chr1:26282281-26320523	14.5309	5.11284	-1.50693	down	0.0246604
HMMR	HMMR	chr5:163460510-163494058	43.3236	15.3317	-1.49863	down	0.0477907
CHRAC1	CHRAC1	chr8:140511297-140517153	27.5495	9.75449	-1.49789	down	0.0380987
CDK2AP1	CDK2AP1	chr12:123260969-123272316	66.3477	23.664	-1.48735	down	0.0367704
BMP4	BMP4	chr14:53949735-53956836	23.2681	8.34345	-1.47964	down	0.0238514
TMEM11	TMEM11	chr17:21197949-21214595	21.1901	7.87219	-1.42855	down	0.0279832
VDAC1	VDAC1	chr5:133971874-134005133	141.498	52.6984	-1.42495	down	0.00659353
SLC4A11	SLC4A11	chr20:3227416-3239241	6.08911	2.29009	-1.41083	down	0.0216376
MORF4L1	MORF4L1	chr15:78872780-78897739	190.495	71.9178	-1.40533	down	0.0320807
SMAD7	SMAD7	chr18:48919852-48950711	8.36226	3.1774	-1.39604	down	0.0475066
H19	H19	chr11_KI270721v1_random:46271-56648	18.6119	7.20482	-1.36919	down	0.0060421
DNAJC27	DNAJC27	chr2:24943635-24972094	4.19179	1.62678	-1.36555	down	0.0378605
CBY1	CBY1	chr22:38656652-38673851	19.5811	7.64731	-1.35644	down	0.0405475
PFN2	PFN2	chr3:149964904-149970954	116.538	46.0786	-1.33864	down	0.0300292
SLC25A39	SLC25A39	chr17:44319624-44324849	105.304	41.6624	-1.33774	down	0.0349531
NASP	NASP	chr1:45583987-45618906	20.118	7.99851	-1.33069	down	0.048046
PRELID2	PRELID2	chr5:145756343-145835369	9.74977	3.88276	-1.32828	down	0.04741
VPS29	VPS29	chr12:110491522-110502140	127.702	50.9786	-1.32481	down	0.0209204
TUBB6	TUBB6	chr18:12307668-12377276	21.7516	8.70446	-1.32129	down	0.0265919
SLC29A1	SLC29A1	chr6:44219504-44234151	80.0409	32.0533	-1.32027	down	0.00494365
JKAMP	JKAMP	chr14:59484442-59576831	72.023	28.9629	-1.31425	down	0.00535314
CHCHD7	CHCHD7	chr8:56211755-56218617	21.3059	8.63308	-1.3033	down	0.00442338
BANF1	BANF1	chr11:65996544-66004146	252.652	102.501	-1.30151	down	0.00716673
MELK	MELK	chr9:36572861-36677683	23.1773	9.50653	-1.28572	down	0.0109396
ELOVL6	ELOVL6	chr4:110049072-110198664	8.10372	3.33614	-1.2804	down	0.0494439
CT45A5	CT45A5,CT45A6,CT45A7	chrX:135828933-135837280	6.12786	2.53964	-1.27076	down	0.0444948
KIF23	KIF23	chr15:69414245-69448427	22.6934	9.71827	-1.2235	down	0.0205691
DSN1	DSN1	chr20:36751790-36773827	26.4681	11.3555	-1.22087	down	0.00694954
MED6	MED6	chr14:70583220-70600690	39.0876	17.2062	-1.18378	down	0.0494836
ACSL3	ACSL3	chr2:222861013-222943401	34.3351	15.1554	-1.17985	down	0.0245909
PGM1	PGM1	chr1:63593275-63660246	20.627	9.18616	-1.167	down	0.0342499
THAP9-AS1	THAP9-AS1	chr4:82893451-82920131	16.8048	7.5064	-1.16268	down	0.0256437
ANLN	ANLN	chr7:36324149-36453791	74.9271	33.7489	-1.15065	down	0.0309515
TUBD1	TUBD1	chr17:59859479-59892945	8.77016	3.98653	-1.13747	down	0.0365972
BRCA1	BRCA1	chr17:43044294-43125483	14.4988	6.61439	-1.13225	down	0.00893437
C16orf13	C16orf13	chr16:634426-636366	20.2065	9.42824	-1.09976	down	0.0294813
BTRC	BTRC	chr10:101354032-101557321	14.0329	6.56734	-1.09543	down	0.033487
GMNN	GMNN	chr6:24774930-24786097	27.3783	12.9554	-1.07948	down	0.0428593
NUSAP1	NUSAP1	chr15:41332693-41381050	45.1083	21.424	-1.07416	down	0.0143268
API5	API5	chr11:43311954-43344530	60.9862	29.3638	-1.05444	down	0.0103953
LRP8	LRP8	chr1:53226891-53328149	3.4563	1.66463	-1.05403	down	0.048039
MAPK7	MAPK7	chr17:19337553-19387219	6.21385	3.00376	-1.04872	down	0.0472787
PTBP3	PTBP3	chr9:112217714-112333664	83.7394	41.2413	-1.02182	down	0.00495223
HNRNPH1	HNRNPH1	chr5:179614177-179623721	125.239	62.4139	-1.00475	down	0.0288369
CIT	CIT	chr12:119685789-119877291	26.277	13.1925	-0.994083	down	0.0344281
PTGR2	PTGR2	chr14:73851830-73885466	43.4567	22.2086	-0.968462	down	0.0175292
MGME1	MGME1	chr20:17941595-17991122	43.2159	22.1827	-0.962126	down	0.0499162
STIL	STIL	chr1:47250138-47314147	9.02303	4.64492	-0.957956	down	0.0124799
CDC25B	CDC25B	chr20:3786771-3806121	37.0985	19.1981	-0.950398	down	0.0365277
NIPA2	NIPA2	chr15:22838640-22868384	21.1689	11.1268	-0.92791	down	0.0178904
HNRNPR	HNRNPR	chr1:23304689-23344364	37.4954	20.1307	-0.897313	down	0.0478421
FN1	FN1	chr2:215360439-215436070	12.1587	6.63435	-0.873964	down	0.0488511
SMC4	SMC4	chr3:160256985-160434961	49.3899	27.222	-0.859443	down	0.0423856
TNIP1	TNIP1	chr5:151029942-151087660	27.7886	15.3629	-0.855043	down	0.015008
CKAP2	CKAP2	chr13:52455359-52476631	42.4627	23.5152	-0.852604	down	0.0477941
ATP2C1	ATP2C1	chr3:130850524-131381475	59.1785	33.2074	-0.833567	down	0.028668
TCEB1	TCEB1	chr8:73945137-73972287	44.2034	25.3756	-0.800716	down	0.0346955
ADAM15	ADAM15	chr1:155033805-155069553	57.1032	81.7624	0.517868	up	0.0482902
SMARCA4	SMARCA4	chr19:10960921-11062282	14.389	23.6404	0.716292	up	0.0274891
SH3BP2	SH3BP2	chr4:2793022-2841096	5.35665	9.19337	0.779262	up	0.0253466
SEZ6L2	SEZ6L2	chr16:29871158-29899264	10.6575	18.6337	0.806044	up	0.035677
C11orf49	C11orf49	chr11:46936688-47177125	13.1334	23.212	0.821625	up	0.0332389
LRRC75A-AS1	LRRC75A-AS1	chr17:16438986-16492191	184.439	326.213	0.822668	up	0.0183503
ATXN2L	ATXN2L	chr16:28823047-28837237	20.1317	35.732	0.827748	up	0.0156233
WDR73	WDR73	chr15:84631459-84654343	6.71838	12.5246	0.898578	up	0.046353
BCAR1	BCAR1	chr16:75229029-75268053	7.24744	13.5284	0.900452	up	0.0374969
BACE1	BACE1	chr11:117232624-117316256	22.1588	41.5357	0.906474	up	0.0116763
POC1B	POC1B,POC1B-GALNT4	chr12:89419720-89526262	16.956	31.8848	0.911074	up	0.0329768
CIZ1	CIZ1	chr9:128166064-128255248	11.593	22.0546	0.927827	up	0.0137517
MAN2C1	MAN2C1	chr15:75355791-75368627	8.36387	15.9232	0.928889	up	0.0361601
ZFYVE27	ZFYVE27	chr10:97737120-97760907	7.32042	14.003	0.935742	up	0.0315132
KANSL3	KANSL3	chr2:96593154-96638379	11.7193	22.6161	0.94846	up	0.00992719
ZBTB7B	ZBTB7B	chr1:155002629-155018525	17.0024	32.9473	0.954422	up	0.0125018
SEC31A	SEC31A	chr4:82818660-82891280	18.0103	35.152	0.964782	up	0.00105894
ZFP64	ZFP64	chr20:52084010-52191985	4.40449	8.69981	0.982009	up	0.0329504
CABLES1	CABLES1	chr18:23134563-23260470	5.5386	11.0406	0.995223	up	0.0425687
TTPAL	TTPAL	chr20:44475885-44494603	5.38375	10.766	0.999804	up	0.0246786
FAM129B	FAM129B	chr9:127505337-127579007	32.9041	65.9131	1.0023	up	0.0432902
NFAT5	NFAT5	chr16:69565965-69704666	6.79242	13.6569	1.00763	up	0.0246087
NFIX	NFIX	chr19:12995769-13098796	6.48734	13.078	1.01144	up	0.0495273
ZFP91	ZFP91,ZFP91-CNTF	chr11:58579113-58625732	19.4281	39.3111	1.01679	up	0.0326596
ZNF664	ZNF664	chr12:123973214-124316024	30.0154	60.7695	1.01765	up	0.039324
ARAP1	ARAP1	chr11:72685068-72752389	8.19871	16.6245	1.01985	up	0.0439047
MTHFSD	MTHFSD	chr16:86530175-86555235	7.95331	16.1428	1.02127	up	0.0466786
FAM222B	FAM222B	chr17:28755977-28842839	3.38737	6.91454	1.02947	up	0.0161573
CCDC120	CCDC120	chrX:49053431-49069858	4.24083	8.6591	1.02987	up	0.0265168
TGIF2	TGIF2,TGIF2-C20orf24	chr20:36573472-36646216	16.4979	33.9076	1.03932	up	0.0326226
GS1-124K5.11	GS1-124K5.11	chr7:66530304-66592407	4.78803	9.85889	1.04199	up	0.0364768
RREB1	RREB1	chr6:7107596-7251980	7.76171	16.0378	1.04703	up	0.0236493
SAMD4A	SAMD4A	chr14:54567611-54793315	6.76097	14.0611	1.05641	up	0.0402957
PKP4	PKP4	chr2:158456879-158681428	12.625	26.3346	1.06067	up	0.044963
TNRC6B	TNRC6B	chr22:40044816-40335808	3.41541	7.12849	1.06154	up	0.0362383
MCCC1	MCCC1	chr3:183015217-183099587	34.3392	72.3288	1.07471	up	0.0223276
ABI1	ABI1	chr10:26697665-26861087	7.87683	16.6007	1.07556	up	0.00480781
CACNA1H	CACNA1H	chr16:1153240-1225254	27.1224	57.2214	1.07707	up	0.0322518
CTPS2	CTPS2	chrX:16587998-16712979	11.7555	24.9805	1.08747	up	0.0460678
TRAK1	TRAK1	chr3:42091253-42225890	4.74033	10.1793	1.10257	up	0.0247754
ELK1	ELK1	chrX:47635519-47650604	10.8975	23.4138	1.10337	up	0.0137959
HR	HR	chr8:22114418-22131052	10.6972	23.0539	1.10778	up	0.0382075
TMEM132A	TMEM132A	chr11:60924440-60951785	50.3704	108.65	1.10904	up	0.0212549
PAQR6	PAQR6	chr1:156212987-156248117	8.9243	19.2817	1.11142	up	0.0179205
VGLL4	VGLL4	chr3:11272323-11720768	12.7112	27.559	1.11643	up	0.0145665
ABL2	ABL2	chr1:179099326-179229684	5.30138	11.5065	1.11801	up	0.0018769
OGFOD3	OGFOD3	chr17:82389209-82450831	2.92801	6.36785	1.12088	up	0.0467693
ZSCAN32	ZSCAN32	chr16:3382080-3401065	3.54277	7.72757	1.12514	up	0.0123221
SULF1	SULF1	chr8:69466623-69660912	7.45867	16.2707	1.12529	up	0.0243228
PPP1R9A	PPP1R9A	chr7:94907636-95296421	1.08623	2.3784	1.13067	up	0.0465087
ZNF202	ZNF202	chr11:123723926-123741683	5.15085	11.2901	1.13218	up	0.0374117
KIAA1522	KIAA1522	chr1:32741910-32774970	16.8426	37.2855	1.1465	up	0.04413
MEF2D	MEF2D	chr1:156463720-156500842	5.35786	11.9134	1.15286	up	0.0337528
PAFAH1B2	PAFAH1B2	chr11:117144283-117178173	28.3687	63.5508	1.16361	up	0.0423886
NEK6	NEK6	chr9:124257605-124352440	13.8349	31.0656	1.167	up	0.0339585
MPST	MPST	chr22:37010858-37029822	6.85493	15.477	1.17491	up	0.0386487
HMHA1	HMHA1	chr19:1065922-1095392	2.43838	5.53787	1.18341	up	0.0115094
TRAPPC6A	TRAPPC6A	chr19:45162927-45178243	14.1778	32.2797	1.187	up	0.0488669
ZNF133	ZNF133	chr20:18288282-18316996	2.89266	6.5954	1.18906	up	0.0436548
THNSL2	THNSL2	chr2:88170294-88186637	7.18976	16.4774	1.19648	up	0.0147167
EIF4E2	EIF4E2	chr2:232547969-232583645	8.87928	20.4678	1.20484	up	0.0434214
THRA	THRA	chr17:40062192-40100725	7.80498	18.0576	1.21014	up	0.00815493
MDM4	MDM4	chr1:204516378-204558120	14.5942	33.8486	1.2137	up	0.0244718
MAP4K3	MAP4K3	chr2:39249265-39437312	4.44589	10.3338	1.21683	up	0.0348422
TBL1X	TBL1X	chrX:9463294-9719740	5.69922	13.2816	1.2206	up	0.0111776
AGAP1	AGAP1	chr2:235494088-236131800	8.71578	20.3425	1.2228	up	0.00619697
THBS3	THBS3	chr1:155195587-155207981	7.47893	17.4677	1.22379	up	0.0139098
RBAK	RBAK	chr7:5045820-5073223	3.68838	8.61489	1.22385	up	0.046527
IL17RC	IL17RC	chr3:9917073-9933621	10.4385	24.3861	1.22414	up	0.00206399
PHF14	PHF14	chr7:10973871-11169623	6.07578	14.2684	1.23168	up	0.0489612
TRIM13	TRIM13	chr13:49982551-50528643	1.87655	4.41011	1.23273	up	0.036909
TSC22D2	TSC22D2	chr3:150408334-150460118	5.28552	12.4691	1.23824	up	0.0454523
AMZ1	AMZ1	chr7:2679521-2715436	25.1846	59.451	1.23916	up	0.00819173
CBLL1	CBLL1	chr7:107743696-107761667	4.47036	10.5734	1.24198	up	0.0221356
ZNF248	ZNF248	chr10:37776525-37858084	3.16858	7.52157	1.2472	up	0.0255999
XRRA1	XRRA1	chr11:74748867-74949187	3.92459	9.33361	1.24989	up	0.0449491
SLC39A14	SLC39A14	chr8:22367248-22434127	7.75566	18.6088	1.26266	up	0.0264423
YTHDF3	YTHDF3	chr8:63168552-63212788	15.7745	38.0349	1.26972	up	0.00623546
NCOR2	NCOR2	chr12:124324410-124567464	5.15232	12.4596	1.27396	up	0.00359863
BCL6	BCL6	chr3:187698258-187745725	5.8794	14.2473	1.27695	up	0.0231293
NFIC	NFIC	chr19:3359562-3469217	6.95567	16.9283	1.28317	up	0.000622868
SHTN1	SHTN1	chr10:116883376-117126586	6.64636	16.2036	1.28568	up	0.0139004
POM121	POM121	chr7:72879334-72954763	12.4888	30.5715	1.29155	up	0.0298656
GATAD2A	GATAD2A	chr19:19385832-19508932	4.89727	12.031	1.29671	up	0.0441894
PHF3	PHF3	chr6:63635801-63715522	7.32195	17.996	1.29738	up	0.0405708
PTGER3	PTGER3	chr1:70852352-71081289	16.7952	41.3994	1.30156	up	0.0400334
TCF3	TCF3	chr19:1609289-1652329	5.93045	14.648	1.30449	up	0.0218122
MVP	MVP	chr16:29816206-29848039	2.28846	5.6612	1.30673	up	0.0380497
SREK1	SREK1	chr5:66144217-66183616	5.74638	14.2448	1.30971	up	0.0460034
TMC6	TMC6	chr17:78112917-78142968	17.9051	44.4254	1.31102	up	0.0132303
C14orf159	C14orf159	chr14:91114012-91225396	12.6538	31.4371	1.3129	up	0.00088885
BRD4	BRD4	chr19:15237489-15280451	6.74168	16.8188	1.3189	up	0.0155817
PRMT2	PRMT2	chr21:46635594-46665124	8.18319	20.4632	1.3223	up	0.0113097
TGOLN2	TGOLN2	chr2:85318017-85328296	13.9069	34.8437	1.3251	up	0.0104034
ALS2CL	ALS2CL	chr3:46668994-46693704	4.73597	11.9021	1.32948	up	0.006155
LPP	LPP	chr3:188151205-188890671	5.20444	13.1021	1.33199	up	0.0462323
RPAIN	RPAIN	chr17:5282262-5439151	7.82263	19.718	1.33379	up	0.00360087
TFAP2A	TFAP2A	chr6:10396682-10419564	14.5339	36.743	1.33805	up	0.00117051
MUC1	MUC1	chr1:155185823-155192915	63.4491	160.663	1.34037	up	0.00575547
AES	AES	chr19:2997637-3064714	14.0302	35.6323	1.34465	up	0.0169725
CCDC51	CCDC51	chr3:48432169-48440119	4.32237	10.9939	1.34681	up	0.0101398
TRPV3	TRPV3	chr17:3510501-3557995	1.68654	4.3011	1.35064	up	0.0463291
PER3	PER3	chr1:7784428-7845180	3.63407	9.29618	1.35505	up	0.0216029
STK40	STK40	chr1:36339618-36385927	3.80048	9.76461	1.36138	up	0.0156247
CD44	CD44	chr11:35138869-35232402	6.47086	16.6452	1.36308	up	0.00350993
MAP7D1	MAP7D1	chr1:36136568-36180849	4.0573	10.5156	1.37393	up	0.0336245
MICAL3	MICAL3	chr22:17787649-18024559	5.64764	14.7108	1.38115	up	0.0241288
RANBP3	RANBP3	chr19:5913643-5978309	2.37635	6.20629	1.38498	up	0.0132961
KCNC3	KCNC3	chr19:50311941-50333515	3.85804	10.0921	1.38728	up	0.0439099
ZNF33A	ZNF33A	chr10:38010649-38060067	3.97265	10.4281	1.3923	up	0.000190841
CLCN7	CLCN7	chr16:1444932-1475084	18.9763	49.8296	1.3928	up	0.0352473
SNHG7	SNHG7	chr9:136712571-136728184	38.4767	101.064	1.39321	up	0.0219696
BTBD9	BTBD9	chr6:38168450-38640148	2.51761	6.62604	1.39609	up	0.00564143
FOXP1	FOXP1	chr3:70954713-71583989	4.22971	11.2826	1.41547	up	0.0173569
MTHFD1L	MTHFD1L	chr6:150865678-151101887	3.62245	9.67363	1.41709	up	0.0131602
MINA	MINA	chr3:97822039-97972451	3.96796	10.6108	1.41906	up	0.0264222
TTC27	TTC27	chr2:32628019-32821051	5.08522	13.6327	1.42269	up	0.0232048
RAPH1	RAPH1	chr2:203433681-203535335	3.07881	8.26371	1.42442	up	0.0403417
CBS	CBS	chr21:43053190-43076362	7.57887	20.3598	1.42567	up	0.0201751
FOXP4	FOXP4	chr6:41523894-41602384	1.35251	3.63791	1.42747	up	0.0161784
ZNF747	ZNF747	chr16:30530366-30534970	3.03104	8.15349	1.42761	up	0.0068651
ZNF497	ZNF497	chr19:58346805-58362848	3.04064	8.18315	1.42828	up	0.0304344
LINC01578	LINC01578	chr15:92882842-92898747	20.1689	54.3648	1.43054	up	0.0463176
AFTPH	AFTPH	chr2:64524304-64593004	8.1612	22.0176	1.4318	up	0.00177605
OBSCN	OBSCN	chr1:228203505-228378874	3.91448	10.5721	1.43337	up	0.00427283
CTIF	CTIF	chr18:48539055-48863215	2.46613	6.69239	1.44027	up	0.0237563
MRFAP1	MRFAP1	chr4:6640090-6642743	49.7879	135.586	1.44534	up	0.033858
ZNF234	ZNF234	chr19:44141556-44160309	1.03877	2.83482	1.44837	up	0.0354881
ARFRP1	ARFRP1	chr20:63657809-63739107	4.86132	13.324	1.45461	up	0.000469337
MGAT4B	MGAT4B	chr5:179797597-179858840	15.737	43.1348	1.45469	up	0.0408335
SORBS2	SORBS2	chr4:185585443-185956716	1.56707	4.30203	1.45695	up	0.0120352
UBP1	UBP1	chr3:33388335-33440405	12.704	34.8833	1.45725	up	0.00964817
PUS1	PUS1	chr12:131929199-131943861	5.7158	15.7113	1.45878	up	0.0269204
MTL5	MTL5	chr11:68707439-68751520	12.9612	35.7437	1.46349	up	0.0282317
NHLRC3	NHLRC3	chr13:39038310-39050107	4.65832	12.8482	1.46369	up	0.0258005
XG	XG	chrX:2752051-2816501	3.94411	10.8912	1.46539	up	0.0198563
MYCL	MYCL	chr1:39895423-39902015	1.00663	2.78698	1.46917	up	0.0250212
ZNF83	ZNF83	chr19:52612364-52690581	8.01553	22.2234	1.47121	up	3.56e-05
RARG	RARG	chr12:53210565-53232256	8.25587	22.9169	1.47292	up	0.0348779
BRWD1	BRWD1	chr21:39185477-39313786	21.629	60.0753	1.47381	up	0.00486144
BRPF1	BRPF1	chr3:9731749-9748015	2.13642	5.94069	1.47543	up	0.0202523
TIMM23B	TIMM23B	chr10:49942032-49974850	5.31801	14.8682	1.48327	up	0.0238205
ZNF513	ZNF513	chr2:27370495-27380744	2.0828	5.86701	1.4941	up	0.045388
SDC1	SDC1	chr2:20200796-20225433	4.54433	12.822	1.49648	up	0.0390597
BCL2L1	BCL2L1	chr20:31664457-31723409	10.5367	29.7554	1.49772	up	0.0054809
JDP2	JDP2	chr14:75427805-75472701	2.73054	7.72124	1.49964	up	0.0406317
MIER1	MIER1	chr1:66924894-66988619	3.09287	8.758	1.50166	up	0.00640563
MROH1	MROH1	chr8:144148015-144261940	8.45633	23.9776	1.50358	up	0.00284484
ZBTB4	ZBTB4	chr17:7459365-7484249	7.01226	19.9335	1.50725	up	0.00551766
TCEA1	TCEA1	chr8:53966553-54022456	28.4223	81.4483	1.51886	up	0.037326
ERBB4	ERBB4	chr2:211375716-212538628	5.27289	15.1664	1.52422	up	0.0395332
TECPR2	TECPR2	chr14:102362962-102502481	3.91965	11.2852	1.52564	up	0.00974306
SSBP4	SSBP4	chr19:18419335-18438301	5.77905	16.6666	1.52806	up	0.0228215
CPSF6	CPSF6	chr12:69239536-69274358	8.18109	23.7189	1.53568	up	0.0336322
ZSCAN31	ZSCAN31	chr6:28324737-28336375	2.36385	6.8571	1.53646	up	0.0252623
DLG2	DLG2	chr11:83455012-85627270	2.38616	6.95451	1.54326	up	0.0483415
ZNF518A	ZNF518A	chr10:96129714-96163761	5.22715	15.344	1.55358	up	0.00614528
SNX21	SNX21	chr20:45833830-45857409	4.1858	12.3343	1.5591	up	0.00191827
ANKRD10	ANKRD10	chr13:110878539-110915107	3.04417	8.97254	1.55947	up	0.0436778
ANGEL2	ANGEL2	chr1:212992181-213015875	3.09502	9.13029	1.56071	up	0.00346457
RPL9	RPL9	chr4:39454124-39458948	142.054	420.674	1.56626	up	0.0334933
CAPN2	CAPN2	chr1:223701592-223776018	18.9984	56.2629	1.5663	up	0.0443031
ZNF717	ZNF717	chr3:75729960-75785583	5.10967	15.1515	1.56816	up	0.018016
LIMK2	LIMK2	chr22:31212263-31280080	12.3379	36.747	1.57453	up	0.0341267
ZNF468	ZNF468	chr19:52838531-52857649	2.17249	6.49632	1.58028	up	0.0100473
CACFD1	CACFD1	chr9:133459964-133470787	7.10265	21.2397	1.58033	up	0.0134286
PLEC	PLEC	chr8:143915146-143976745	18.5998	55.7434	1.58351	up	0.00161603
SMG1P2	SMG1P2	chr16:30267592-30335374	12.2869	36.9155	1.5871	up	0.0184658
TCF7L2	TCF7L2	chr10:112950249-113167677	1.4684	4.4169	1.58879	up	0.0158951
SPDYE2B	SPDYE2B	chr7:102636747-102671729	3.6687	11.0785	1.59442	up	0.024842
SLC33A1	SLC33A1	chr3:155826510-155854459	6.26961	18.9911	1.59887	up	0.0365045
COX11	COX11	chr17:54900690-54968703	6.65937	20.1811	1.59955	up	0.0474393
DNM1	DNM1	chr9:128166064-128255248	1.61094	4.88372	1.60008	up	0.03029
WNK2	WNK2	chr9:93184929-93346414	0.736959	2.24609	1.60776	up	0.020829
GATA3	GATA3	chr10:8054703-8075201	63.7159	195.67	1.6187	up	0.0203405
LOC146880	LOC146880	chr17:64749661-64781999	7.75816	23.8484	1.6201	up	0.0183002
RCAN1	RCAN1	chr21:34516442-34615142	16.318	50.1929	1.62102	up	0.0113527
TRPV1	TRPV1	chr17:3565445-3636322	2.45484	7.58064	1.62669	up	0.0235852
PWWP2B	PWWP2B	chr10:132397197-132417854	4.32679	13.4451	1.63571	up	0.00799221
ADAMTS13	ADAMTS13	chr9:133361448-133459403	2.41206	7.51648	1.63979	up	0.0391609
ZNF33B	ZNF33B	chr10:42574182-42638837	2.60133	8.10681	1.63989	up	0.00121022
TOM1	TOM1	chr22:35299274-35347994	3.45181	10.8958	1.65835	up	0.0295519
PHACTR2	PHACTR2	chr6:143608179-143831185	1.97277	6.22736	1.6584	up	0.0267571
STARD13	STARD13	chr13:33103134-33676835	4.86447	15.3698	1.65974	up	0.0218592
AMT	AMT	chr3:49416777-49429324	1.86675	5.92382	1.666	up	0.0138237
PITX1	PITX1	chr5:135027733-135399887	17.24	55.2433	1.68004	up	0.0493577
CARF	CARF	chr2:202880599-202986485	1.1121	3.56411	1.68026	up	0.040721
CPAMD8	CPAMD8	chr19:16892950-17026815	6.8293	21.9736	1.68596	up	0.0479339
GPT2	GPT2	chr16:46884379-46931297	5.75724	18.5698	1.68951	up	0.0221852
CREB3L2	CREB3L2	chr7:137874978-138002101	4.93613	16.0703	1.70294	up	0.0146747
KIFC3	KIFC3	chr16:57758216-57802527	2.44234	7.9634	1.70512	up	0.0213994
NME1-NME2	NME1-NME2	chr17:51153535-51171744	7.4624	24.3326	1.70518	up	0.0495336
ANKRD11	ANKRD11	chr16:89267620-89490561	4.90819	16.0584	1.71007	up	0.00707818
IKZF2	IKZF2	chr2:212999685-213151609	1.27992	4.20429	1.71581	up	0.0324366
ZNF135	ZNF135	chr19:58059238-58069742	1.64997	5.43852	1.72078	up	0.00684945
DNAAF2	DNAAF2	chr14:49625173-49635230	3.83788	12.7029	1.72678	up	0.0279221
STEAP3	STEAP3	chr2:119223807-119265651	2.63731	8.7327	1.72736	up	0.00207016
CBFA2T3	CBFA2T3	chr16:88874854-88977096	8.11472	26.9219	1.73017	up	0.00502246
ZNF226	ZNF226	chr19:44165061-44177685	4.77549	15.8813	1.7336	up	0.0110871
DNAJB12	DNAJB12	chr10:72332829-72355149	2.10137	6.99193	1.73436	up	0.00263374
TNFRSF21	TNFRSF21	chr6:47231526-47309947	4.64511	15.4621	1.73495	up	0.046394
YAP1	YAP1	chr11:102110460-102233423	18.5738	61.8452	1.73539	up	1.05e-05
PSAT1	PSAT1	chr9:78297074-78330093	18.8685	62.8676	1.73634	up	0.0435139
CLMN	CLMN	chr14:95181938-95319908	6.14828	20.5277	1.73932	up	0.0449135
CCM2	CCM2	chr7:44999745-45076470	2.69643	9.00692	1.73998	up	0.0402157
MIRLET7BHG	MIRLET7BHG	chr22:46085996-46113928	1.46347	4.89754	1.74266	up	0.00425359
TTLL11	TTLL11	chr9:121821924-122093606	0.811877	2.71746	1.74292	up	0.0423929
EXD3	EXD3	chr9:137306893-137423262	4.83966	16.2113	1.74402	up	0.00779715
WDR44	WDR44	chrX:118346072-118449960	1.07585	3.61453	1.74833	up	0.0472268
LOC729737	LOC729737	chr1:134772-140566	4.31399	14.5019	1.74915	up	0.0431694
MBD6	MBD6	chr12:57522875-57547331	3.69887	12.483	1.7548	up	0.0412969
PLCE1	PLCE1	chr10:93993988-94328391	7.38066	24.9125	1.75505	up	0.00161576
MC1R	MC1R	chr16:89917878-89920977	5.60302	18.9577	1.75851	up	0.0420045
COL7A1	COL7A1	chr3:48564072-48595160	1.40718	4.76332	1.75916	up	0.0468587
FOXN3	FOXN3	chr14:89156171-89619150	2.87296	9.7303	1.75995	up	0.000602967
PTPN21	PTPN21	chr14:88465777-88554779	2.99684	10.16	1.76138	up	0.0444379
SLC7A1	SLC7A1	chr13:29509413-29595688	10.1869	34.6869	1.76767	up	0.0401578
CRNDE	CRNDE	chr16:54918862-54929189	7.18246	24.6636	1.77984	up	0.00832244
SYTL3	SYTL3	chr6:158650013-158764876	0.731931	2.5143	1.78038	up	0.0473346
RPS21	RPS21	chr20:62387064-62388520	291.777	1002.82	1.78113	up	0.0383746
RRAGB	RRAGB	chrX:55717676-55758774	4.56589	15.6966	1.78148	up	0.0250516
CLDN3	CLDN3	chr7:73768996-73770270	19.8793	68.4571	1.78393	up	0.0365961
HSF4	HSF4	chr16:67159987-67169945	6.5722	22.643	1.78462	up	0.00156678
CCDC7	CCDC7	chr10:32446081-32882864	0.670737	2.31779	1.78893	up	0.0307575
TSC22D3	TSC22D3	chrX:107713221-107775787	4.72641	16.3408	1.78966	up	0.0147437
RORC	RORC	chr1:151806070-151831872	4.87619	16.8658	1.79027	up	0.034612
KLHDC10	KLHDC10	chr7:130070508-130135720	4.81756	16.6677	1.79068	up	0.0411962
LRRC8D	LRRC8D	chr1:89821013-89936430	6.74614	23.371	1.79259	up	0.00371651
TAX1BP3	TAX1BP3	chr17:3636467-3696404	7.10806	24.6584	1.79455	up	0.0467125
SFPQ	SFPQ	chr1:35183599-35193142	16.6179	57.9348	1.80169	up	0.0354251
ZNF710	ZNF710	chr15:90001490-90082200	2.10346	7.37372	1.80963	up	0.0420873
CBX4	CBX4	chr17:79833155-79839414	7.38943	26.0648	1.81857	up	0.0332525
PFKFB2	PFKFB2	chr1:207053274-207081023	4.26296	15.051	1.81993	up	0.0358638
AP5Z1	AP5Z1	chr7:4775630-4794395	5.3816	19.0007	1.81994	up	0.0338907
ZFHX3	ZFHX3	chr16:72782886-73058635	1.63998	5.79811	1.82191	up	0.00203703
NAA30	NAA30	chr14:57390552-57412748	5.89558	20.918	1.82703	up	0.0385386
ASNS	ASNS	chr7:97852116-97872542	15.8801	56.5479	1.83225	up	0.0183169
TMEM141	TMEM141	chr9:136791324-136793317	24.5753	87.5433	1.83279	up	0.0326386
ELK4	ELK4	chr1:205607942-205632872	4.02003	14.3274	1.8335	up	0.0364118
ATF7IP2	ATF7IP2	chr16:10386054-10483638	2.44446	8.7373	1.83767	up	0.0238608
DHX37	DHX37	chr12:124946823-124989121	3.74243	13.4086	1.84111	up	0.0349696
HELQ	HELQ	chr4:83407342-83455883	1.28584	4.61439	1.84343	up	0.0350392
PCK2	PCK2	chr14:24094130-24104132	14.7698	53.1674	1.84789	up	0.0224066
MVB12B	MVB12B	chr9:126326843-126507041	1.17465	4.23872	1.85139	up	0.0471384
SLIT2	SLIT2	chr4:20253563-20620561	0.585163	2.11295	1.85235	up	0.0425366
ZNF337	ZNF337	chr20:25624044-25696904	2.97379	10.75	1.85396	up	0.000695842
ZFP36L1	ZFP36L1	chr14:68787654-68796243	18.7869	67.9406	1.85454	up	0.0113349
MGC27345	MGC27345	chr7:128297684-128307763	0.895585	3.23942	1.85483	up	0.0469432
NPHP1	NPHP1	chr2:110123335-110205062	0.353059	1.27842	1.85638	up	0.032984
CCDC144B	CCDC144B	chr17:18537800-18625617	4.22233	15.3578	1.86286	up	0.0359633
TVP23C-CDRT4	TVP23C-CDRT4	chr17:15436014-15563631	1.22279	4.45544	1.86539	up	0.0281145
CLIP3	CLIP3	chr19:36014498-36054762	0.344006	1.25984	1.87274	up	0.0429338
C6orf132	C6orf132	chr6:42101118-42142977	3.68361	13.5526	1.87937	up	0.0272268
ASTN2	ASTN2	chr9:116425224-117415039	6.74129	24.8641	1.88297	up	0.00199224
ECI1	ECI1	chr16:2239871-2251601	14.1473	52.5009	1.89182	up	0.03363
METTL21A	METTL21A	chr2:207529891-207625331	7.66252	28.4649	1.89329	up	0.00694268
DPY19L3	DPY19L3	chr19:32405748-32485893	1.50134	5.60063	1.89934	up	0.0332648
FLJ42627	FLJ42627	chr16:2638981-2646129	0.923773	3.44802	1.90016	up	0.0406456
SLC7A5P2	SLC7A5P2	chr16:21517908-21520444	5.76919	21.5497	1.90123	up	0.0348718
STK17A	STK17A	chr7:43583092-43627379	2.57679	9.63195	1.90225	up	0.0494477
DCAKD	DCAKD	chr17:45023337-45061109	3.46659	12.9699	1.90358	up	0.00046048
ATP5S	ATP5S	chr14:50312328-50326228	2.16158	8.11011	1.90763	up	0.0307012
MSRB3	MSRB3	chr12:65278642-65642372	1.54926	5.82218	1.90998	up	0.00664148
MOB2	MOB2	chr11:1469447-1486779	2.18758	8.2317	1.91186	up	0.0183606
DDX28	DDX28	chr16:68021273-68079323	2.75494	10.3793	1.91361	up	0.0441826
LOC100289580	LOC100289580	chr16:88706482-88785220	1.06755	4.02455	1.91452	up	0.0458476
CCDC85A	CCDC85A	chr2:56173533-56386174	0.996204	3.75658	1.91491	up	0.0483556
VPS13B	VPS13B	chr8:99013265-99877586	6.24598	23.5603	1.91536	up	0.000190294
VPS53	VPS53	chr17:508667-714856	2.55219	9.68514	1.92404	up	0.0110966
ZNF652	ZNF652	chr17:49289205-49380094	4.56471	17.3655	1.92763	up	0.0188983
LOC606724	LOC606724	chr16:30183409-30189254	3.06636	11.6891	1.93057	up	0.028496
SKI	SKI	chr1:2228694-2310213	4.63288	17.6643	1.93086	up	0.0252385
SLC39A11	SLC39A11	chr17:72645945-73092714	14.7321	56.1795	1.93108	up	0.00123785
HOXC4	HOXC4	chr12:54016851-54056030	0.795681	3.03913	1.93339	up	0.0234574
ZDHHC18	ZDHHC18	chr1:26826709-26855720	1.76457	6.75034	1.93564	up	0.0412838
UVSSA	UVSSA	chr4:1347315-1388049	3.03665	11.6178	1.93579	up	0.0288713
AFF3	AFF3	chr2:99547253-100142575	6.32034	24.2059	1.93728	up	0.000829497
CCDC90B	CCDC90B	chr11:83259092-83286407	5.53457	21.276	1.94268	up	0.00251676
KAZN	KAZN	chr1:14598716-15152464	0.829425	3.19582	1.946	up	0.0270803
LOC101928936	LOC101928936	chr6:88525923-88539369	1.67582	6.45727	1.94606	up	0.037857
NFE2L3	NFE2L3	chr7:26152226-26187136	2.68508	10.3527	1.94697	up	0.0343484
OPHN1	OPHN1	chrX:68042343-68433457	4.31132	16.633	1.94785	up	0.0249066
GSE1	GSE1	chr16:85611422-85676206	53.0936	204.847	1.94794	up	0.00120627
SYNC	SYNC	chr1:32651147-32702760	2.57948	9.99402	1.95398	up	0.0309478
ATXN1	ATXN1	chr6:16299111-16761490	3.67939	14.2792	1.95638	up	0.022495
PPARGC1B	PPARGC1B	chr5:149730251-149855022	1.22461	4.75584	1.95738	up	0.0104219
OPLAH	OPLAH	chr8:144051265-144060703	2.00525	7.78907	1.95767	up	0.03438
SCNN1D	SCNN1D	chr1:1280435-1292029	0.845621	3.2888	1.95948	up	0.0237264
SHANK2	SHANK2	chr11:70467855-71224796	9.07686	35.356	1.96169	up	0.00791631
FOXK1	FOXK1	chr7:4682298-4771443	7.36289	28.7407	1.96475	up	0.0228271
ZNF26	ZNF26	chr12:132986347-133012568	6.491	25.3407	1.96495	up	0.0134722
TPM4	TPM4	chr19:16067506-16103003	0.871523	3.41725	1.97123	up	0.0383811
GANAB	GANAB	chr11:62624825-62646726	68.9033	270.794	1.97455	up	0.000440301
RIN2	RIN2	chr20:19886520-20002459	0.87011	3.43745	1.98207	up	0.0254965
NKPD1	NKPD1	chr19:45149749-45160150	0.924252	3.65678	1.98422	up	0.0478919
C1orf122	C1orf122	chr1:37802941-37809454	5.65871	22.4023	1.9851	up	0.00319858
NABP1	NABP1	chr2:191678071-191688522	0.619398	2.46282	1.99137	up	0.0497328
SLC4A5	SLC4A5	chr2:74216241-74343407	1.28293	5.11146	1.99429	up	0.0295457
ZFP14	ZFP14	chr19:36334452-36379203	0.443405	1.77024	1.99725	up	0.0456894
RIPK2	RIPK2	chr8:89757746-89791064	3.06132	12.2369	1.99901	up	0.0342895
IFT27	IFT27	chr22:36758201-36776133	2.85894	11.4572	2.0027	up	0.0378528
MYO15B	MYO15B	chr17:75588057-75708062	1.40806	5.64437	2.0031	up	0.0226609
LINC01002	LINC01002	chr19:197015-202209	0.699328	2.80438	2.00364	up	0.0471431
TCEANC	TCEANC	chrX:13653105-13665408	0.698523	2.80726	2.00679	up	0.00982592
SETBP1	SETBP1	chr18:44680172-45068510	0.824293	3.32089	2.01034	up	0.0103469
DET1	DET1	chr15:88512482-88546681	1.98964	8.03797	2.01432	up	0.00805914
GOLGA8B	GOLGA8B	chr15:34525282-34583570	2.411	9.75762	2.0169	up	0.00668148
SCARNA10	SCARNA10	chr12:6494131-6531966	43.4416	175.833	2.01705	up	0.0321857
PMS2P5	PMS2P5	chr7:74890767-74921138	10.7322	43.4582	2.01768	up	0.015815
GPCPD1	GPCPD1	chr20:5544433-5611026	3.68566	14.9348	2.01868	up	0.0278825
LOC101928233	LOC101928233	chr21:42599403-42615095	2.30436	9.36718	2.02325	up	0.0390952
ZFP36L2	ZFP36L2	chr2:43222401-43226606	4.42281	17.982	2.02352	up	0.0219915
C16orf95	C16orf95	chr16:87302797-87317420	1.09251	4.442	2.02356	up	0.0341494
BMS1P4	BMS1P4	chr10:73699150-73730514	2.30397	9.37972	2.02542	up	0.0409107
NANOS1	NANOS1	chr10:119029715-119034342	0.778923	3.18287	2.03078	up	0.045962
LINC00999	LINC00999	chr10:38428145-38452153	1.71099	7.00423	2.0334	up	0.0259981
KMT2D	KMT2D	chr12:49018974-49055324	5.16462	21.1456	2.03362	up	0.0211483
AUTS2	AUTS2	chr7:69598918-70793068	5.33304	21.9621	2.04199	up	0.00946582
NOLC1	NOLC1	chr10:102152175-102163871	8.40941	34.6602	2.0432	up	3.69e-05
CREB3L4	CREB3L4	chr1:153959098-153977975	12.1709	50.251	2.04572	up	1e-05
FAM173B	FAM173B	chr5:10225507-10249909	2.57014	10.6536	2.05142	up	0.0304871
FAM122A	FAM122A	chr9:68705413-69009176	0.942147	3.91267	2.05413	up	0.0464194
ZNF586	ZNF586	chr19:57769651-57780616	2.07599	8.63182	2.05587	up	0.0181503
PREX1	PREX1	chr20:48624254-48827883	14.3572	60.5115	2.07544	up	0.0178899
RABL2B	RABL2B	chr22:50757085-50799637	1.40311	5.95395	2.08522	up	0.000627466
LOC100129917	LOC100129917	chr4:780148-781848	3.24525	13.7778	2.08595	up	0.0215423
GAS6	GAS6	chr13:113815609-113864103	7.22891	30.6964	2.08622	up	0.0168677
LINC00894	LINC00894	chrX:149938547-150016787	0.817764	3.47755	2.08831	up	0.0493686
C11orf72	C11orf72	chr11:67602879-67606706	11.1023	47.3041	2.09111	up	0.015797
SLC37A2	SLC37A2	chr11:125063116-125090516	0.685982	2.94556	2.1023	up	0.0453057
ODF2L	ODF2L	chr1:86346823-86396342	2.56367	11.0286	2.10497	up	0.0174114
MEIOB	MEIOB	chr16:1827223-1872178	2.04314	8.81317	2.10887	up	0.0359902
SLC6A9	SLC6A9	chr1:43991607-44031492	1.58934	6.85961	2.1097	up	0.0287325
EPPK1	EPPK1	chr8:143857318-143878464	4.55732	19.6738	2.11002	up	0.0139148
SESN2	SESN2	chr1:28259451-28282491	4.81833	20.9449	2.12	up	0.0150043
BEND3P3	BEND3P3	chr10:79682974-79688894	1.27696	5.55541	2.12118	up	0.0200918
IRX2	IRX2	chr5:2746164-2751655	2.34502	10.2268	2.12468	up	0.00163223
GRB10	GRB10	chr7:50590062-50793462	7.13779	31.1376	2.12511	up	2.88e-06
LOC100131257	LOC100131257	chr7:7075769-7096786	0.174033	0.759332	2.12537	up	0.0405896
BMS1P6	BMS1P6	chr10:47535580-47553523	5.72913	25.1031	2.13147	up	0.0167529
USP32P1	USP32P1	chr17:16786891-16804505	5.29831	23.221	2.13182	up	0.0163679
RABEP2	RABEP2	chr16:28878487-28925211	2.7886	12.242	2.13423	up	0.0215597
PHKG1	PHKG1	chr7:56064223-56092996	2.18669	9.61324	2.13627	up	0.0147484
LOC440300	LOC440300	chr15:84191847-84230168	1.25056	5.52995	2.14469	up	0.0155199
AATBC	AATBC	chr21:43805757-43812567	0.589593	2.60932	2.14588	up	0.0293388
LOC100133331	LOC100133331	chr1:725758-730351	1.18011	5.22426	2.1463	up	0.0283811
FAM86B3P	FAM86B3P	chr8:8228569-8244865	0.531931	2.35594	2.14699	up	0.0436215
TCF7L1	TCF7L1	chr2:85133459-85310388	1.12257	4.97572	2.1481	up	0.0265092
BMP8A	BMP8A	chr1:39491645-39559698	0.621512	2.7631	2.15244	up	0.030817
TNFRSF18	TNFRSF18	chr1:1203507-1206709	3.06619	13.6565	2.15507	up	0.0316704
LOC101928600	LOC101928600	chr5:58541566-58558243	2.98566	13.362	2.16202	up	0.0300457
NPIPB9	NPIPB9	chr16:28752434-28772823	1.462	6.54784	2.16307	up	0.031116
SMG1P5	SMG1P5	chr16:30267592-30335374	3.37797	15.1755	2.16751	up	0.0256589
LOC100131564	LOC100131564	chr1:93310108-93345811	3.96749	17.8432	2.16908	up	0.0196023
ZNF469	ZNF469	chr16:88427470-88440757	0.24354	1.09834	2.17309	up	0.0238236
IQCH-AS1	IQCH-AS1	chr15:67200674-67527303	0.520647	2.34912	2.17374	up	0.0231435
LOC102724699	LOC102724699	chr3:186810879-186825521	29.6353	134.299	2.18006	up	0.0109064
BRI3	BRI3	chr7:98281666-98401115	10.3599	46.9707	2.18076	up	0.0173881
RRN3P3	RRN3P3	chr16:22419545-22492220	0.903918	4.11074	2.18514	up	0.0404449
TOR4A	TOR4A	chr9:137277827-137282641	0.780959	3.55186	2.18525	up	0.0320126
DNAJC18	DNAJC18	chr5:139410202-139439525	0.874615	3.98513	2.18791	up	0.0308913
TRIM16	TRIM16	chr17:15627965-15682879	2.2164	10.1209	2.19105	up	0.0190292
CEBPG	CEBPG	chr19:33373668-33382686	6.23119	28.5265	2.19472	up	0.00374138
PLEKHG4	PLEKHG4	chr16:67278156-67326758	2.49592	11.4411	2.19658	up	0.000999538
TBC1D32	TBC1D32	chr6:121079493-121334500	0.963949	4.41971	2.19692	up	0.0341278
YARS	YARS	chr1:32775238-32858879	12.6708	58.1199	2.19753	up	0.0105291
ORC4	ORC4	chr2:147844516-148513475	17.3781	79.7301	2.19785	up	0.000707949
GOLGA3	GOLGA3	chr12:132768908-132828840	7.84096	36.0781	2.20202	up	0.0057863
TVP23C	TVP23C,TVP23C-CDRT4	chr17:15436014-15563631	1.62344	7.49342	2.20657	up	0.026361
LOC100130417	LOC100130417	chr1:916817-919692	0.344475	1.59176	2.20815	up	0.049316
TTC30B	TTC30B	chr2:177550152-177552796	1.19907	5.54469	2.2092	up	0.0337784
GGACT	GGACT	chr13:100089014-100588792	1.00945	4.67368	2.211	up	0.0305547
FAM173A	FAM173A	chr16:721141-726473	1.672	7.75619	2.21378	up	0.0376438
MCC	MCC	chr5:112976709-113488830	0.662083	3.07364	2.21486	up	0.0180309
PLA2G12A	PLA2G12A	chr4:109709988-109730086	3.2465	15.0852	2.21618	up	0.0147158
SYT15	SYT15	chr10:47747648-47762793	1.53062	7.12757	2.2193	up	0.00100555
DFFB	DFFB	chr1:3857266-3885429	0.660227	3.07521	2.21965	up	0.0278723
PFN1P2	PFN1P2	chr1:120432203-120434109	8.0355	37.4733	2.2214	up	0.0125813
SOX9	SOX9	chr17:72121019-72126419	6.66823	31.1297	2.22292	up	0.00907239
TMEM65	TMEM65	chr8:124310917-124372699	2.59176	12.1008	2.22309	up	0.0160758
PDZRN3	PDZRN3	chr3:73382429-73627899	0.580336	2.71283	2.22484	up	0.0123672
ZXDB	ZXDB	chrX:57591835-57597477	1.5563	7.27975	2.22577	up	0.0154434
FER1L4	FER1L4	chr20:35558736-35607562	1.46459	6.86225	2.22818	up	0.0138283
ARHGAP30	ARHGAP30	chr1:161046941-161069970	0.494235	2.32616	2.23468	up	0.0135019
NPIPB3	NPIPB3	chr16:21402133-21425337	3.04857	14.3963	2.23949	up	0.0118097
WDR27	WDR27	chr6:169457207-169702063	1.14789	5.42093	2.23955	up	0.00199178
PCDHGB2	PCDHGB2	chr5:141330684-141512981	0.616686	2.91812	2.24243	up	0.02775
ARHGEF26-AS1	ARHGEF26-AS1	chr3:154024400-154257827	2.00788	9.56446	2.25201	up	0.0302488
LOC613037	LOC613037	chr16:30223028-30245611	2.35687	11.2445	2.25428	up	0.0130316
CPEB2	CPEB2	chr4:15002673-15446167	0.526744	2.51961	2.25803	up	0.0189445
VIM	VIM	chr10:17214238-17237593	0.845098	4.05757	2.26343	up	0.0374286
RAC3	RAC3	chr17:82031655-82034204	3.47369	16.7114	2.26629	up	0.0194438
LTBP2	LTBP2	chr14:74498182-74612331	1.18811	5.71711	2.26662	up	0.0101421
GSN-AS1	GSN-AS1	chr9:121268101-121332842	0.778539	3.75941	2.27166	up	0.019287
NUPR1	NUPR1	chr16:28537340-28539174	24.376	117.772	2.27247	up	0.00821809
APC2	APC2	chr19:1450148-1479229	0.20287	0.986107	2.28119	up	0.0360857
TAPT1-AS1	TAPT1-AS1	chr4:16226662-16258187	1.1953	5.81208	2.28169	up	0.0282442
TMEM75	TMEM75	chr8:127890627-128101253	2.41082	11.7352	2.28324	up	0.01846
DHRS12	DHRS12	chr13:51767992-51804162	1.44803	7.05333	2.28422	up	0.0201207
ESPNP	ESPNP	chr1:16691217-16720157	0.50985	2.4963	2.29165	up	0.0415257
TMEM42	TMEM42	chr3:44861887-44865667	2.64235	12.9401	2.29196	up	0.0294717
TTLL3	TTLL3	chr3:9779963-9836356	1.15474	5.65503	2.29197	up	0.00322598
USP32P2	USP32P2	chr17:18511261-18521252	0.524815	2.57044	2.29213	up	0.0300703
NBR2	NBR2	chr17:43125582-43145108	1.95865	9.60265	2.29357	up	0.0317696
LOC729732	LOC729732	chr8:12437012-12665611	0.354167	1.73995	2.29654	up	0.0353315
ZNF10	ZNF10	chr12:133130627-133159463	1.0044	4.93782	2.29754	up	0.0254827
ZNF517	ZNF517	chr8:144798875-144809144	0.959307	4.71851	2.29827	up	0.0267381
FDPSP2	FDPSP2	chr7:76461654-76505995	0.454959	2.24462	2.30266	up	0.0270994
TENM1	TENM1	chrX:124375905-124963817	0.998921	4.93019	2.3032	up	0.00292712
FPGT	FPGT	chr1:74198211-74544432	1.18708	5.87003	2.30595	up	0.0347137
RRS1-AS1	RRS1-AS1	chr8:66419586-66428977	0.689965	3.41896	2.30896	up	0.0344258
FAM195B	FAM195B	chr17:81822360-81833294	1.75022	8.67987	2.31014	up	0.0054781
ZNF721	ZNF721	chr4:425434-499171	1.80403	9.00548	2.31958	up	0.0149998
L3MBTL1	L3MBTL1	chr20:43507679-43541895	0.569138	2.84398	2.32106	up	0.0258845
NUTM2D	NUTM2D	chr10:87357719-87370695	1.01612	5.08123	2.32211	up	0.0110927
DNHD1	DNHD1	chr11:6497295-6572024	1.59262	7.9716	2.32347	up	0.00120333
NINL	NINL	chr20:25452700-25585517	0.70899	3.55695	2.3268	up	0.0184912
COL6A2	COL6A2	chr21:46098118-46132849	0.44651	2.24149	2.32769	up	0.00563494
ZNF671	ZNF671	chr19:57719750-57727627	0.634936	3.20427	2.33531	up	0.0351663
NR2F1-AS1	NR2F1-AS1	chr5:93409355-93581320	1.08971	5.50896	2.33783	up	0.00217792
HOTS	HOTS	chr11_KI270721v1_random:46271-56648	0.433983	2.22271	2.35661	up	0.0152675
AMIGO1	AMIGO1	chr1:109506823-109509714	0.390127	1.99813	2.35664	up	0.0383751
MEIS2	MEIS2	chr15:36891020-37101299	0.339233	1.74013	2.35885	up	0.0293067
LOC100294362	LOC100294362	chr17:80260860-80438084	0.35113	1.80161	2.35921	up	0.03779
C5orf38	C5orf38	chr5:2752130-2755397	3.06976	15.7951	2.36328	up	0.0139635
SPDYE6	SPDYE6	chr7:102345751-102356444	1.16239	6.00453	2.36896	up	0.0161794
LRRC75A	LRRC75A	chr17:16438986-16492191	1.85357	9.63105	2.37739	up	0.0102015
C1orf167	C1orf167	chr1:11762192-11847783	0.158821	0.827385	2.38116	up	0.0468491
ZNF14	ZNF14	chr19:19710471-19733112	0.60011	3.13129	2.38346	up	0.0362007
RGPD8	RGPD8	chr2:112368368-112433645	0.558915	2.91719	2.38388	up	0.00631532
MNT	MNT	chr17:2384059-2400964	1.20475	6.33789	2.39527	up	0.0073106
TRIM66	TRIM66	chr11:8612036-8658836	1.02515	5.40286	2.39789	up	0.0070611
CD164	CD164	chr6:109366513-109382559	27.2996	144.395	2.40307	up	4.73e-08
BICD2	BICD2	chr9:92711362-92764801	1.18429	6.27398	2.40536	up	0.00253093
GATA6	GATA6	chr18:22169436-22202528	0.792505	4.20638	2.40809	up	0.0141193
ZNF154	ZNF154	chr19:57696274-57709211	0.791747	4.20342	2.40845	up	0.0059626
GPR132	GPR132	chr14:105049388-105065550	3.11749	16.56	2.40925	up	0.0012674
PNPLA7	PNPLA7	chr9:137459951-137550569	4.38316	23.3009	2.41034	up	0.00529626
UBE2B	UBE2B	chr5:134371175-134392108	2.77133	14.7496	2.41203	up	0.0116555
HERPUD1	HERPUD1	chr16:56932089-56943881	14.5651	77.7252	2.41587	up	0.00330008
GNG7	GNG7	chr19:2511219-2702748	0.206764	1.10343	2.41594	up	0.0437196
PET117	PET117	chr20:18137854-18188387	2.83237	15.1413	2.41841	up	0.0333635
LOC101928336	LOC101928336	chrX:119291528-119335610	0.45956	2.46247	2.42178	up	0.0263773
UNC5B	UNC5B	chr10:71212534-71302878	1.06055	5.70454	2.4273	up	0.00356924
ATP6AP1L	ATP6AP1L	chr5:82279461-82318646	0.629795	3.3916	2.42901	up	0.0417519
KMT2E-AS1	KMT2E-AS1	chr7:105010541-105014141	1.46905	7.93482	2.43332	up	0.0118031
PCDHGB6	PCDHGB6	chr5:141330684-141512981	0.272052	1.4776	2.4413	up	0.0334781
LINC00174	LINC00174	chr7:66376043-66400408	1.22421	6.66056	2.4438	up	0.0126049
CEBPB	CEBPB	chr20:50184602-50192691	11.0723	60.2881	2.44492	up	0.00492228
HIST1H3F	HIST1H3F	chr6:26250141-26250607	28.4194	154.922	2.44659	up	0.00722051
SERPINF1	SERPINF1	chr17:1761964-1777565	0.885201	4.82847	2.44749	up	0.029879
KCNF1	KCNF1	chr2:10911936-10914225	2.10391	11.4981	2.45025	up	0.0111362
NUTM2A	NUTM2A	chr10:87225447-87234976	0.904777	4.96797	2.45702	up	0.0117482
PLIN5	PLIN5	chr19:4522530-4535196	2.72618	14.9907	2.45911	up	0.00877253
CREBRF	CREBRF	chr5:173056351-173139288	0.518311	2.86543	2.46686	up	0.0126743
LYRM9	LYRM9	chr17:27878313-27893383	2.29772	12.7044	2.46705	up	0.0175116
AMOTL1	AMOTL1	chr11:94768341-94876753	0.739823	4.09815	2.46972	up	0.000294867
CGRRF1	CGRRF1	chr14:54509868-54538616	2.33312	12.9453	2.4721	up	0.0250451
TMEM105	TMEM105	chr17:81311270-81330674	0.299623	1.66662	2.4757	up	0.0310434
MAP3K10	MAP3K10	chr19:40191743-40215575	0.68885	3.86035	2.48647	up	0.0137951
LOC729348	LOC729348	chr2:66383305-66392446	19.2566	107.927	2.48663	up	0.00412154
BMPR1B	BMPR1B	chr4:94757976-95158450	0.335325	1.88904	2.49402	up	0.0179872
SPATC1	SPATC1	chr8:144012413-144047114	0.238746	1.34795	2.49722	up	0.0130921
PRICKLE2	PRICKLE2	chr3:64067963-64225455	0.254558	1.43863	2.49863	up	0.0211392
HOXC8	HOXC8	chr12:54009105-54012761	0.49236	2.78336	2.49904	up	0.0247375
ERVH48-1	ERVH48-1	chr21:42917250-42925598	0.282812	1.60725	2.50668	up	0.0464471
RNF112	RNF112	chr17:19411177-19417276	0.181982	1.03749	2.51122	up	0.049278
DNAH1	DNAH1	chr3:52316318-52400497	0.461569	2.64721	2.51986	up	0.00624551
RPL23AP53	RPL23AP53	chr8:208344-247340	0.620949	3.5644	2.52111	up	0.0159701
CLHC1	CLHC1	chr2:55172550-55235853	0.368609	2.12485	2.5272	up	0.0282711
LOC399715	LOC399715	chr10:6326543-6335981	1.29498	7.48169	2.53044	up	0.0148257
SYN1	SYN1	chrX:47561099-47619857	0.317289	1.83758	2.53394	up	0.0278431
EMILIN3	EMILIN3	chr20:41340852-41366858	0.418922	2.4375	2.54065	up	0.0188117
CAMK2B	CAMK2B	chr7:44217149-44325631	0.468622	2.7373	2.54626	up	0.0024246
ASCL2	ASCL2	chr11:2268497-2270952	0.921404	5.38756	2.54773	up	0.0243494
LEF1	LEF1	chr4:108047544-108176430	0.127811	0.754922	2.56231	up	0.035331
UBLCP1	UBLCP1	chr5:159263080-159286040	1.22556	7.24528	2.56359	up	0.0130119
NPIPB11	NPIPB11	chr16:29381317-29403802	0.888128	5.25902	2.56595	up	0.00942137
BTBD18	BTBD18	chr11:57712522-57819180	0.447849	2.65956	2.5701	up	0.0174862
STEAP3-AS1	STEAP3-AS1	chr2:119223807-119265651	0.391971	2.36154	2.59091	up	0.0242115
PCDHA2	PCDHA2	chr5:140786135-141012344	0.581543	3.50524	2.59155	up	0.0152418
PPIL6	PPIL6	chr6:109390214-109443919	0.165494	1.0009	2.59645	up	0.0407887
LINC00884	LINC00884	chr3:194487139-194488545	1.59993	9.67704	2.59656	up	0.0175131
LOC100130987	LOC100130987	chr11:67317838-67391687	0.627178	3.81061	2.60307	up	0.0437146
APOL4	APOL4	chr22:36189127-36204833	0.364243	2.21442	2.60396	up	0.0288271
RPL23AP64	RPL23AP64	chr11:118998132-119018347	2.17795	13.2676	2.60687	up	0.023061
MACC1	MACC1	chr7:19918980-20217390	0.545871	3.33437	2.61078	up	0.0111374
SMG1P3	SMG1P3	chr16:21446682-21502281	9.62165	58.9111	2.61418	up	0.00312047
PDCL3P4	PDCL3P4	chr3:101712433-101713416	0.285358	1.75149	2.61774	up	0.0455212
MEX3D	MEX3D	chr19:1554668-1568058	1.38147	8.48515	2.61873	up	0.000322702
RNASEH1-AS1	RNASEH1-AS1	chr2:3558385-3561750	0.247621	1.52094	2.61876	up	0.0468918
NLRP1	NLRP1	chr17:5501398-5584512	0.553065	3.40976	2.62415	up	0.000716911
SMG1P1	SMG1P1	chr16:22419545-22492220	9.85493	60.7595	2.62419	up	0.00299973
N4BP2L2-IT2	N4BP2L2-IT2	chr13:32432487-32538885	0.753865	4.66145	2.6284	up	0.0186545
ADM2	ADM2	chr22:50481555-50486437	1.32648	8.23401	2.63399	up	0.000864154
RNF224	RNF224	chr9:137227565-137229638	0.951355	5.9216	2.63793	up	0.0140193
DUX4	DUX4	chr4:190173773-190175845	2.08139	13.0137	2.64441	up	0.000137089
SSPO	SSPO	chr7:149776041-149833964	0.326436	2.04132	2.64463	up	0.00555837
SNORD3A	SNORD3A	chr17:19188015-19188232	8.1622	51.1853	2.6487	up	0.0492035
BEX2	BEX2	chrX:103309345-103311046	0.899866	5.64343	2.64879	up	0.0166939
ZNF780B	ZNF780B	chr19:40028259-40056208	0.790235	4.96046	2.65012	up	0.00903185
PPP3CB-AS1	PPP3CB-AS1	chr10:73436427-73575675	0.324918	2.04374	2.65307	up	0.0192665
FMO4	FMO4	chr1:171314182-171342084	0.37761	2.37989	2.65593	up	0.0441197
GPRASP2	GPRASP2	chrX:102599167-102717733	0.376683	2.38362	2.66173	up	0.025278
KANK3	KANK3	chr19:8322583-8343262	0.46475	2.96473	2.67338	up	0.0239987
CACNA1F	CACNA1F	chrX:49205062-49233371	0.206906	1.3226	2.67633	up	0.00975652
LINC01000	LINC01000	chr7:128641240-128660998	2.64673	16.9429	2.6784	up	0.00190469
RPS16P5	RPS16P5	chr6:53267397-53349179	0.619414	3.97233	2.68101	up	0.0172704
PLXNC1	PLXNC1	chr12:94148722-94307675	0.195819	1.25865	2.68429	up	0.0431272
CCT6B	CCT6B	chr17:34927858-34961509	0.65096	4.19261	2.68721	up	0.0311185
C2orf16	C2orf16	chr2:27576521-27582722	0.121755	0.789027	2.6961	up	0.0280883
IDI2	IDI2	chr10:1018906-1049121	1.06414	6.95741	2.70886	up	0.0171597
LINC00342	LINC00342	chr2:95807051-95826981	0.505079	3.3103	2.71238	up	0.00968619
JMY	JMY	chr5:79236101-79327215	1.18458	7.79315	2.71783	up	0.00293726
KLK8	KLK8	chr19:50996007-51001702	0.40314	2.65712	2.72051	up	0.0198806
LHFP	LHFP	chr13:39342891-39603219	1.06469	7.02653	2.72238	up	0.0057771
KNDC1	KNDC1	chr10:133160466-133226412	0.238044	1.57482	2.72589	up	0.00993695
CFAP126	CFAP126	chr1:161314375-161367883	1.10774	7.35075	2.73027	up	0.0237629
FBXL16	FBXL16	chr16:692499-705825	0.624717	4.16683	2.73767	up	0.00621031
LOC101926898	LOC101926898	chr6:46220729-46533480	5.14299	34.3597	2.74004	up	0.00633437
GTF2IRD1P1	GTF2IRD1P1	chr7:66682090-66844826	0.86422	5.77854	2.74123	up	0.0116836
LOC101928118	LOC101928118	chr1:95092516-95247225	0.22427	1.50256	2.74411	up	0.0391809
FBXL17	FBXL17	chr5:107859032-108382098	0.788961	5.31432	2.75186	up	0.00592443
CLMP	CLMP	chr11:123072324-123195299	0.176732	1.19187	2.75359	up	0.0367829
HSD17B7P2	HSD17B7P2	chr10:38356379-38378505	0.183107	1.24608	2.76664	up	0.0361593
LOC100506985	LOC100506985	chr1:24539273-24556024	0.213703	1.45738	2.7697	up	0.0390789
LINC01004	LINC01004	chr7:104981746-104991165	0.512135	3.54235	2.79011	up	0.00710371
ZNF815P	ZNF815P	chr7:5823159-5854435	0.68072	4.72942	2.79653	up	0.00764701
TRAF3IP2-AS1	TRAF3IP2-AS1	chr6:111299030-111606274	0.347443	2.41667	2.79817	up	0.00856003
NUTM2B	NUTM2B	chr10:79691499-79827602	0.446604	3.15358	2.81992	up	0.00752867
ZNF546	ZNF546	chr19:39997035-40021041	0.112148	0.793213	2.8223	up	0.0348093
PCLO	PCLO	chr7:82754004-83162881	0.598044	4.23143	2.82282	up	0.000165492
TBC1D19	TBC1D19	chr4:26583923-26756213	0.425175	3.01308	2.82511	up	0.0243006
DLSTP1	DLSTP1	chr1:75724346-75763678	0.152066	1.08432	2.83402	up	0.0356899
KCNIP2	KCNIP2	chr10:101819067-101843920	0.259041	1.84774	2.83451	up	0.00961448
AMOT	AMOT	chrX:112774876-112840815	0.203697	1.4628	2.84423	up	0.00147293
FOXP3	FOXP3	chrX:49235466-49264826	0.113948	0.819068	2.84561	up	0.0291962
PIN4P1	PIN4P1	chr15:43870760-44195294	0.14082	1.01276	2.84637	up	0.0402404
KGFLP2	KGFLP2	chr9:39813783-39875395	0.316256	2.27565	2.84712	up	0.0152902
ABCC9	ABCC9	chr12:21797389-21936694	1.93962	13.9574	2.84719	up	0.00226078
NDUFS6	NDUFS6	chr5:1801381-1816051	1.06979	7.74314	2.85559	up	0.026974
LOC102723769	LOC102723769	chr22:11897405-11956534	4.49564	32.6606	2.86095	up	0.00257921
C10orf88	C10orf88	chr10:122930902-122954403	0.553814	4.02973	2.86321	up	0.012605
FOXH1	FOXH1	chr8:144466336-144476335	1.29449	9.44609	2.86733	up	0.00305667
PCDHB18P	PCDHB18P	chr5:141234332-141237529	0.117852	0.866416	2.87809	up	0.0389188
ATP1A1-AS1	ATP1A1-AS1	chr1:116373172-116418622	0.324951	2.39139	2.87956	up	0.0225485
LINC00506	LINC00506	chr3:87089279-87157069	31.0792	229.031	2.88152	up	0.00149112
CCDC138	CCDC138	chr2:108786749-108876591	0.375704	2.77332	2.88394	up	0.0279916
NOXO1	NOXO1	chr16:1978916-1981549	0.237691	1.75565	2.88485	up	0.0484997
PLAC4	PLAC4	chr21:41167800-41282534	0.506553	3.76216	2.89278	up	0.00247054
LOC389641	LOC389641	chr8:23225220-23230926	0.687314	5.10826	2.89379	up	0.0140042
CHRND	CHRND	chr2:232526159-232536665	0.173395	1.29317	2.89878	up	0.0166675
ZNF235	ZNF235	chr19:44286347-44305025	0.414424	3.09214	2.89943	up	0.0112378
CCDC144A	CCDC144A	chr17:16690324-16774999	0.847501	6.33035	2.901	up	9.51e-05
KDM6B	KDM6B	chr17:7839916-7854800	1.34451	10.0637	2.90401	up	0.0007086
SPIN2A	SPIN2A	chrX:57135649-57137625	0.235	1.76651	2.91017	up	0.0363279
RFTN1	RFTN1	chr3:16315844-16513715	0.137301	1.03401	2.91283	up	0.0277948
HSD17B14	HSD17B14	chr19:48813016-48836677	0.153951	1.16055	2.91427	up	0.0418211
NPIPB5	NPIPB5	chr16:22513522-22536520	4.1029	31.364	2.93439	up	0.000827584
SPDYE1	SPDYE1	chr7:43926435-44019194	1.03615	7.92424	2.93504	up	0.00426458
NPIPB4	NPIPB4	chr16:21834562-21857756	3.03464	23.3	2.94073	up	0.000874736
LINC00950	LINC00950	chr9:35860273-35865518	0.112031	0.862655	2.94489	up	0.0242408
PCDHA7	PCDHA7	chr5:140786135-141012344	0.144629	1.11491	2.94651	up	0.0434129
NUTM2G	NUTM2G	chr9:96929003-96942290	0.216741	1.67508	2.95018	up	0.00526583
FREM2	FREM2	chr13:38687035-38887130	0.245634	1.90493	2.95515	up	0.00277992
LOC286437	LOC286437	chrX:104099213-104157027	0.30139	2.3424	2.95829	up	0.020952
GOLGA6L4	GOLGA6L4,GOLGA6L5P	chr15:84428348-84516847	0.315605	2.45296	2.95833	up	0.00148409
PCDHGC4	PCDHGC4	chr5:141330684-141512981	0.14874	1.15815	2.96097	up	0.0272706
ALX3	ALX3	chr1:110060374-110070700	0.229245	1.79331	2.96767	up	0.0284126
ACADS	ACADS	chr12:120725737-120740008	1.05448	8.30965	2.97825	up	0.00516875
CDK14	CDK14	chr7:90596361-91210590	0.495899	3.9319	2.98711	up	0.00493858
TRMT10A	TRMT10A	chr4:99546706-99564057	0.443522	3.52322	2.98982	up	0.00787237
ZNF19	ZNF19	chr16:71474072-71489351	0.198133	1.57641	2.9921	up	0.0184218
FAM27E3	FAM27E3	chr9:67717497-67719179	0.199459	1.58706	2.99219	up	0.0188503
TEKT4	TEKT4	chr2:94868684-94947342	0.10444	0.835146	2.99936	up	0.0343795
ASB9P1	ASB9P1	chr15:92795483-92797108	0.136213	1.09354	3.00507	up	0.0228829
SCARNA6	SCARNA6	chr2:233251570-233295674	4.53088	36.4361	3.00751	up	0.0184839
SLC9A4	SLC9A4	chr2:102473302-102533972	0.711664	5.73346	3.01014	up	0.00439051
LOC284412	LOC284412	chr19:37265938-37269010	3.05489	24.7408	3.0177	up	0.00118343
PCDHB11	PCDHB11	chr5:141199774-141203045	0.162815	1.32556	3.02529	up	0.0220295
BEST1	BEST1	chr11:61949883-61967660	0.369234	3.00673	3.02559	up	0.000509834
KIAA1683	KIAA1683	chr19:18257095-18274509	0.222353	1.8265	3.03815	up	0.0045751
LOC100190986	LOC100190986	chr16:22504448-22506880	10.9774	91.6654	3.06184	up	3.25e-08
SCARNA12	SCARNA12	chr12:6965351-6970753	1.74036	14.5487	3.06343	up	0.0409853
LOC101929567	LOC101929567	chr2:8559832-8583792	2.94418	24.6472	3.06549	up	0.000507778
ZNF750	ZNF750	chr17:82752063-82943186	0.163842	1.37713	3.07129	up	0.0112523
ALOX12-AS1	ALOX12-AS1	chr17:6985122-7012334	0.637063	5.35606	3.07166	up	0.0260569
BBC3	BBC3	chr19:47220821-47232766	0.521144	4.39774	3.07701	up	0.00714595
BRWD1-IT2	BRWD1-IT2	chr21:39313906-39314915	1.38309	11.6907	3.0794	up	0.00434259
ZNF765	ZNF765	chr19:53395143-53412009	0.481885	4.07399	3.07968	up	0.00679163
PARP15	PARP15	chr3:122577601-122639047	5.28896	44.7187	3.07982	up	0.000656612
LOC100134317	LOC100134317	chr19:36311342-36312668	0.366862	3.11868	3.08763	up	0.0401246
LINC00886	LINC00886	chr3:156747342-156817062	0.143012	1.21927	3.09181	up	0.0230336
LOC644919	LOC644919	chr14:40954710-41141048	0.883679	7.53886	3.09275	up	0.0211164
LOXL1	LOXL1	chr15:73917467-73952137	0.0953415	0.818418	3.10166	up	0.034913
CD72	CD72	chr9:35605283-35618427	0.12208	1.04847	3.10239	up	0.0201045
CXorf57	CXorf57	chrX:106611929-106679443	0.0937821	0.813706	3.11712	up	0.0242686
H1FX-AS1	H1FX-AS1	chr3:129314770-129324569	0.134394	1.16893	3.12064	up	0.0212886
ASH1L-AS1	ASH1L-AS1	chr1:155335260-155563944	0.452676	3.97428	3.13414	up	0.00571562
MAML2	MAML2	chr11:95976592-96343180	0.129183	1.13574	3.13615	up	0.00556017
SCX	SCX	chr8:144262045-144291438	0.60534	5.37061	3.14927	up	0.0114472
GNRHR2	GNRHR2	chr1:145919012-145927536	0.159465	1.41545	3.14995	up	0.0322816
UGT8	UGT8	chr4:114598454-114677046	1.27138	11.3273	3.15533	up	0.00407829
TSPYL5	TSPYL5	chr8:96645226-97446497	0.127727	1.1387	3.15626	up	0.0155979
IRAIN	IRAIN	chr15:98645865-98964530	0.0849014	0.759676	3.16153	up	0.0148646
XKR9	XKR9	chr8:70669364-70735942	0.718116	6.51731	3.18199	up	0.00733182
KCNE4	KCNE4	chr2:223051929-223055637	0.129975	1.18859	3.19295	up	0.0186538
PROX2	PROX2	chr14:74853032-74863834	0.159973	1.46625	3.19623	up	0.0145762
HSPA6	HSPA6	chr1:161524539-161526897	0.802449	7.37205	3.19959	up	0.00184892
NR2E3	NR2E3	chr15:71810547-71818256	0.0874643	0.804267	3.20091	up	0.00544807
MIRLET7DHG	MIRLET7DHG	chr9:94176569-94204566	0.484427	4.4726	3.20677	up	0.0215676
VWCE	VWCE	chr11:61258285-61295316	0.160489	1.48827	3.21309	up	0.00850339
ZNF385C	ZNF385C	chr17:41966740-42038026	0.193731	1.79883	3.21493	up	0.00804912
SH3BP5-AS1	SH3BP5-AS1	chr3:15254183-15341394	0.20452	1.90193	3.21715	up	0.00586784
C3orf35	C3orf35	chr3:37386268-37435497	0.199178	1.86331	3.22574	up	0.0116974
DPP9-AS1	DPP9-AS1	chr19:4675230-4723843	0.0900632	0.843526	3.22742	up	0.018757
NHLRC1	NHLRC1	chr6:18120486-18122620	0.561805	5.27965	3.2323	up	0.00491428
KRCC1	KRCC1	chr2:88027202-88055801	0.634735	5.9914	3.23867	up	0.00657159
HEATR4	HEATR4	chr14:73478483-73558947	0.272419	2.57378	3.23999	up	0.00520194
SH3GL1P1	SH3GL1P1	chr17:32021135-32053501	0.110269	1.04216	3.24049	up	0.0152012
USP3-AS1	USP3-AS1	chr15:63504510-63602421	0.442438	4.21273	3.25121	up	0.00883267
SPDYE8P	SPDYE8P	chr7:75320771-75359038	2.28901	21.8066	3.25197	up	8.3e-11
LINC01016	LINC01016	chr6:33889510-33896907	0.127644	1.2165	3.25255	up	0.0151001
SNORA73A	SNORA73A	chr1:28505942-28539196	19.7982	188.78	3.25326	up	0.0027941
LPXN	LPXN	chr11:58526870-58578239	0.50589	4.83393	3.2563	up	0.00249135
PCDHGB8P	PCDHGB8P	chr5:141330684-141512981	0.145427	1.39224	3.25904	up	0.0283151
LINC00654	LINC00654	chr20:5498571-5504596	0.185192	1.77487	3.26062	up	0.00780528
FAM106CP	FAM106CP	chr17:16786891-16804505	0.341875	3.30275	3.27213	up	0.0148653
FOXN3-AS1	FOXN3-AS1	chr14:89156171-89619150	0.200998	1.94514	3.27463	up	0.0202689
LOC101926889	LOC101926889	chr20:25184671-25226724	0.263999	2.55626	3.27543	up	0.00804354
CD5	CD5	chr11:61102457-61127851	0.198448	1.93089	3.28243	up	0.00539314
FLJ12825	FLJ12825	chr12:54058253-54122234	0.205814	2.01513	3.29146	up	0.00674265
CXCR5	CXCR5	chr11:118883765-118910904	0.136138	1.33301	3.29154	up	0.0135648
GRIN1	GRIN1	chr9:137139156-137170039	0.134024	1.32353	3.30384	up	0.00146173
TMEM44-AS1	TMEM44-AS1	chr3:194584267-194633421	0.88727	8.78924	3.30829	up	0.000843925
GPER1	GPER1	chr7:996986-1138257	0.259979	2.58361	3.31292	up	0.00213855
LOC729603	LOC729603	chr6:159969098-160106551	0.518421	5.18537	3.32225	up	0.00307098
GDF15	GDF15	chr19:18386157-18389176	2.77916	27.9566	3.33047	up	0.0010909
ZNF880	ZNF880	chr19:52369916-52385793	0.122361	1.23673	3.33731	up	0.00808836
SRSF8	SRSF8	chr11:95066876-95071224	0.499584	5.07253	3.34391	up	0.00179499
LINC00472	LINC00472	chr6:71407864-71420745	0.626927	6.37047	3.34503	up	3.05e-06
CCDC154	CCDC154	chr16:1434387-1444489	0.138454	1.41035	3.34858	up	0.0180195
LOC101928673	LOC101928673	chr1:173235059-173477155	0.17769	1.82847	3.36321	up	0.0150669
MET	MET	chr7:116672404-116798386	0.0741585	0.766961	3.37047	up	0.00692608
SPRN	SPRN	chr10:133394116-133424617	0.533547	5.53502	3.3749	up	0.000792651
MARCKS	MARCKS	chr6:113857334-113863475	0.0995656	1.04778	3.39555	up	0.0120344
LOC101929147	LOC101929147	chr1:119031215-119275973	0.516984	5.45717	3.39996	up	0.00113721
ZNF702P	ZNF702P	chr19:52968250-52993531	0.161579	1.71324	3.40642	up	0.0122223
SH3D21	SH3D21	chr1:36306392-36321347	0.107583	1.14205	3.4081	up	0.00730376
LINC00536	LINC00536	chr8:115950510-116325059	0.0756837	0.805719	3.41222	up	0.00788232
IRS2	IRS2	chr13:109753836-109786567	0.273861	2.91617	3.41256	up	0.000991983
PCDHGC5	PCDHGC5	chr5:141330684-141512981	0.0780623	0.836498	3.42166	up	0.017759
LOC100129434	LOC100129434	chr2:56173533-56386174	21.7077	233.789	3.42893	up	0.000145574
FAM24B	FAM24B,FAM24B-CUZD1	chr10:122832154-122898714	0.426553	4.60609	3.43274	up	0.00825086
NLRC3	NLRC3	chr16:3500944-3577404	0.134928	1.47116	3.4467	up	0.00293238
MGC16275	MGC16275	chr17:74209995-74213321	0.196229	2.17236	3.46865	up	0.00413543
FAM106A	FAM106A	chr17:18524565-18526846	0.114434	1.26794	3.46989	up	0.00691452
MIR17HG	MIR17HG	chr13:91347819-91354575	0.226471	2.51477	3.47303	up	0.01441
KRT86	KRT86	chr12:52301864-52309163	0.234319	2.65711	3.50331	up	0.00688894
YY1	YY1	chr14:100238764-100279034	4.80895	54.5346	3.50338	up	4.59e-05
LOC100128770	LOC100128770	chr16:3027866-3039132	0.451028	5.11832	3.50438	up	0.000892814
CALHM2	CALHM2	chr10:103446785-103452405	0.211628	2.4134	3.51146	up	0.00335984
XIST	XIST	chrX:73792204-73852753	2.06207	23.8854	3.53396	up	7.3e-05
LRRC46	LRRC46	chr17:47831626-47841333	0.0935515	1.09556	3.54976	up	0.0193055
ACVR2B-AS1	ACVR2B-AS1	chr3:38451026-38493142	0.127349	1.49266	3.55103	up	0.00943429
KCNAB1	KCNAB1	chr3:156120547-156539138	0.174853	2.05504	3.55495	up	0.00755762
SPDYE3	SPDYE3	chr7:100307701-100367831	0.159882	1.8971	3.56872	up	0.00463533
HLF	HLF	chr17:55264959-55325065	0.177345	2.11033	3.57284	up	0.00285571
KCNIP2-AS1	KCNIP2-AS1	chr10:101819067-101843920	0.124955	1.5012	3.58664	up	0.0196015
LHFPL5	LHFPL5	chr6:35805293-35824075	0.123533	1.49332	3.59556	up	0.00542296
LOC100130744	LOC100130744	chr5:14704799-14871778	0.102725	1.25728	3.61345	up	0.00842226
GOLGA6L5P	GOLGA6L5P	chr15:84428348-84516847	0.0827731	1.01849	3.62112	up	0.00624194
LOC644285	LOC644285	chr5:87268252-87391926	0.103321	1.27138	3.62119	up	0.00569256
SMIM5	SMIM5	chr17:75588057-75708062	0.199827	2.4804	3.63375	up	0.000667287
FAM106B	FAM106B	chr17:20417291-20419050	0.0845449	1.05173	3.6369	up	0.0292166
TRIB3	TRIB3	chr20:380628-397559	9.59287	119.465	3.63848	up	0
AVIL	AVIL	chr12:57782744-57816069	0.147267	1.83653	3.64048	up	0.00457904
RNF139-AS1	RNF139-AS1	chr8:124462496-124474563	0.147562	1.87526	3.6677	up	0.0036715
AAMDC	AAMDC	chr11:77821161-77872352	0.233813	3.02949	3.69565	up	0.0283804
COL5A1	COL5A1	chr9:134641804-134872618	0.0938256	1.2168	3.69697	up	0.00132785
LOC442028	LOC442028	chr2:94868684-94947342	0.108122	1.47274	3.76777	up	0.00330729
LOC101927374	LOC101927374	chr3:78597237-79767909	1.14571	15.6648	3.77321	up	0.000299525
LOC643406	LOC643406	chr20:5471195-5477134	0.951534	13.1572	3.78945	up	8.42e-05
SPATA17	SPATA17	chr1:217631323-217868153	0.0697152	0.965755	3.79211	up	0.0209734
PCDHGA8	PCDHGA8	chr5:141330684-141512981	0.0694226	0.964704	3.79661	up	0.0127367
CROCCP3	CROCCP3	chr1:16467435-16492701	0.0816622	1.14898	3.81455	up	0.00319328
PROB1	PROB1	chr5:139391945-139395196	0.62743	8.83415	3.81556	up	0.000259818
AKR1B1	AKR1B1	chr7:134442354-134459136	0.0959345	1.35887	3.82421	up	0.00370358
CDKN2B	CDKN2B	chr9:21994790-22121094	0.119399	1.70809	3.83852	up	0.000925491
KCNQ1OT1	KCNQ1OT1	chr11:2444990-2861569	0.50165	7.21349	3.84595	up	2.7e-05
LURAP1L-AS1	LURAP1L-AS1	chr9:12693385-12823060	0.500074	7.20835	3.84946	up	0.00170815
LOC401320	LOC401320	chr7:30548356-30577779	0.428841	6.19989	3.85373	up	0.000389016
MTMR7	MTMR7	chr8:17246891-17413531	0.0938774	1.40785	3.90657	up	0.0032721
DDIT3	DDIT3	chr12:57487952-57520517	6.99219	105.029	3.9089	up	3.24e-09
PRSS23	PRSS23	chr11:86791058-86955398	0.0693032	1.04887	3.91977	up	0.000393455
LOC100131496	LOC100131496	chr20:47209213-47356889	0.11791	1.80252	3.93425	up	0.0037301
UGDH-AS1	UGDH-AS1	chr4:39527838-39638861	10.3914	160.479	3.94892	up	1.3e-05
PPP4R3CP	PPP4R3CP	chrX:27460210-27463341	0.0503795	0.787163	3.96575	up	0.0150526
KCNQ4	KCNQ4	chr1:40784011-40840452	0.0936384	1.48186	3.98416	up	0.00242918
SMCR5	SMCR5	chr17:17681472-17837011	0.107706	1.70461	3.98427	up	0.0034536
LOC389834	LOC389834	chrUn_GL000218v1:38785-97454	0.987594	15.7626	3.99644	up	1.67e-05
SCARNA5	SCARNA5	chr2:233251570-233295674	15.9149	255.691	4.00595	up	0.000194759
DSCR9	DSCR9	chr21:37208502-37221736	0.0871738	1.4159	4.02168	up	0.00273504
JPH3	JPH3	chr16:87601834-87698155	0.107523	1.75081	4.02531	up	0.00120776
CRIPAK	CRIPAK	chr4:1391551-1395994	0.159148	2.6168	4.03936	up	0.00516034
SHANK2-AS3	SHANK2-AS3	chr11:70467855-71224796	0.103852	1.71238	4.04341	up	0.00628951
LINC01024	LINC01024	chr5:140102921-140108012	0.0789324	1.30397	4.04615	up	0.00379126
LINC00504	LINC00504	chr4:14470465-14888169	3.37495	57.9172	4.10105	up	9.06e-06
FKBP1AP1	FKBP1AP1	chr19:57825298-57827462	0.350075	6.07328	4.11674	up	0.00122271
FOXP2	FOXP2	chr7:114086309-114693772	0.082264	1.43433	4.12397	up	0.000787563
FLJ20021	FLJ20021	chr4:101347776-101348883	0.133168	2.40951	4.17742	up	0.0019943
LINGO3	LINGO3	chr19:2289774-2308157	0.123329	2.23403	4.17907	up	0.00353287
LOC101929106	LOC101929106	chr3:187197089-187207629	0.0530425	0.963424	4.18295	up	0.00141941
SHISA9	SHISA9	chr16:12901619-13240416	2.46903	44.8892	4.18435	up	2.17e-06
SRGAP2-AS1	SRGAP2-AS1	chr1:144641368-145093362	0.0803614	1.46304	4.18632	up	0.000183269
CHAC1	CHAC1	chr15:40953437-40956519	0.197937	3.6404	4.20098	up	0.00165771
PMF1-BGLAP	PMF1-BGLAP	chr1:156212987-156248117	0.150945	2.78684	4.20653	up	0.0178795
SCARNA9	SCARNA9	chr11:93661649-93730356	1.21007	22.7598	4.23332	up	0.000593098
C19orf35	C19orf35	chr19:2274631-2282182	0.134665	2.54585	4.2407	up	0.00160786
TMEM27	TMEM27	chrX:15627315-15665031	0.0694563	1.3319	4.26124	up	0.00968687
ZEB1-AS1	ZEB1-AS1	chr10:31316527-31319095	0.0623346	1.21412	4.28374	up	0.0092422
COMMD8	COMMD8	chr4:47450793-47463659	0.270178	5.26651	4.28486	up	0.00727186
P2RY11	P2RY11	chr19:10106222-10119923	0.0700972	1.37214	4.29093	up	0.0467451
PRR34	PRR34	chr22:46050458-46058522	0.0810053	1.58859	4.29359	up	0.00195702
LIMS2	LIMS2	chr2:127638420-127681786	0.0697017	1.36979	4.29662	up	0.00104034
SYS1-DBNDD2	SYS1-DBNDD2	chr20:45361936-45410610	0.0554622	1.09212	4.29948	up	0.0202857
ESRG	ESRG	chr3:54122665-55074557	0.152633	3.03969	4.31578	up	0.000497747
ZNF860	ZNF860	chr3:31660824-31991736	0.0865009	1.7295	4.3215	up	0.00280287
TEX19	TEX19	chr17:82359246-82363776	0.065106	1.30654	4.32682	up	0.000821946
LOC102606465	LOC102606465	chr1:101025845-101087379	0.106901	2.14534	4.32686	up	0.00833476
LOC653653	LOC653653	chr17:60101759-60102919	0.35493	7.22675	4.34774	up	0.000380573
SPDYE5	SPDYE5	chr7:75493626-75504304	0.313456	6.40801	4.35354	up	0.00010763
ZNF816-ZNF321P	ZNF816-ZNF321P	chr19:52927134-52962911	0.0561799	1.18316	4.39645	up	0.0417464
PRSS12	PRSS12	chr4:118280037-118352767	0.0491128	1.03458	4.3968	up	0.000456031
C9orf131	C9orf131	chr9:35041094-35045991	0.0619363	1.33639	4.43141	up	0.00204392
FLJ43315	FLJ43315	chr9:64016949-64061612	0.0521308	1.14311	4.45468	up	0.00694275
DICER1-AS1	DICER1-AS1	chr14:95086227-95179933	0.205177	4.50644	4.45705	up	0.00225297
BAIAP2L2	BAIAP2L2	chr22:38084888-38110669	0.0640504	1.40792	4.45822	up	0.00362167
MAP3K15	MAP3K15	chrX:19343892-19515261	0.0901694	2.06066	4.51432	up	0.00053083
43713	43713	chr22:19714463-19724774	0.194694	4.62529	4.57026	up	0.00025697
LOC100129617	LOC100129617	chr16:81445169-81711763	0.0442563	1.06572	4.5898	up	0.0371648
LRRC4	LRRC4	chr7:127652147-128092607	0.0423902	1.02091	4.58998	up	0.00184812
GUSBP10	GUSBP10	chr7:57165669-57180156	0.0370955	0.896165	4.59445	up	0.00820723
CYP2E1	CYP2E1	chr10:133527362-133539116	0.0691867	1.7178	4.63392	up	0.000289075
FTX	FTX	chrX:73944323-74293574	0.134472	3.38129	4.6522	up	0.000159513
SLC16A1-AS1	SLC16A1-AS1	chr1:112956414-112964068	0.0472967	1.197	4.66154	up	0.00390116
LOC100505736	LOC100505736	chr2:27781363-28338900	0.0521309	1.33578	4.6794	up	0.0303068
TMEM212	TMEM212	chr3:171843348-171859318	0.537253	14.1549	4.71956	up	3.86e-05
FAM27E2	FAM27E2	chr9:41647673-41649440	0.038595	1.04733	4.76215	up	0.000267933
TOB2P1	TOB2P1	chr6:28215337-28218929	0.0281963	0.784785	4.79872	up	0.000207138
ATP6V0E2-AS1	ATP6V0E2-AS1	chr7:149867693-149880712	0.0420788	1.18638	4.81733	up	0.00104649
MAB21L2	MAB21L2	chr4:150264658-151015497	0.0683034	2.02521	4.88997	up	0.000302854
ACTG1P17	ACTG1P17	chr15:82725897-82739780	0.0360428	1.08507	4.91194	up	0.00338766
ZSCAN12P1	ZSCAN12P1	chr6:28090806-28095715	0.0986929	3.01419	4.93268	up	8.58e-05
USH2A	USH2A	chr1:215622893-216423396	0.0337245	1.05942	4.97334	up	6.24e-05
CD8A	CD8A	chr2:86784604-86808396	0.0265551	0.84099	4.98503	up	0.00159556
KLRD1	KLRD1	chr12:10304450-10317251	0.0612685	1.94933	4.99169	up	0.0198982
FLRT1	FLRT1	chr11:63998557-64166113	0.12804	4.14378	5.01629	up	2.15e-05
PVRIG	PVRIG	chr7:100177723-100272232	0.03365	1.132	5.07213	up	0.0093696
FOXD4L5	FOXD4L5	chr9:65282100-65285209	0.0405273	1.37326	5.08256	up	7.18e-05
TMEM191B	TMEM191B	chr22:18527801-18530573	0.0393844	1.34788	5.09692	up	0.0312745
CAMK2D	CAMK2D	chr4:113451031-113761927	0.0912893	3.12886	5.09905	up	1.65e-05
LOC100506551	LOC100506551	chr12:116910955-117031148	0.065763	2.40472	5.19245	up	0.00032888
LOC100507487	LOC100507487	chr4:128428015-128519396	0.129999	4.76991	5.19739	up	1.95e-05
EID3	EID3	chr12:104215778-104350307	0.178707	6.59245	5.20515	up	0.000238398
THSD4-AS2	THSD4-AS2	chr15:71141448-71783383	0.120958	4.54696	5.23233	up	0.000259241
AQP1	AQP1	chr7:30911799-30925516	0.0249932	0.978458	5.2909	up	0.0159931
LOC101928535	LOC101928535	chr11:106250018-106264905	1.69174	66.6093	5.29915	up	1.04e-09
TRPC6	TRPC6	chr11:101451563-101583928	0.266281	11.0027	5.36877	up	4.26e-06
LOC100499484-C9ORF174	LOC100499484-C9ORF174	chr9:97238425-97377295	0.0270522	1.14341	5.40145	up	0.00138655
GSG1	GSG1	chr12:13083536-13103696	0.0251144	1.07089	5.41416	up	0.000950109
RASGRP1	RASGRP1	chr15:38488097-38564806	0.0222803	0.972311	5.44758	up	0.000340601
CATSPERG	CATSPERG	chr19:38335802-38370949	0.018617	0.830362	5.47905	up	0.000870712
FAM41C	FAM41C	chr1:868070-876802	0.105533	4.8608	5.52543	up	6.72e-06
SLC7A11	SLC7A11	chr4:138027422-138242349	0.151994	7.41754	5.60886	up	3.63e-06
MBP	MBP	chr18:76978832-77132818	0.0154398	0.782905	5.66412	up	0.0141183
AIFM2	AIFM2	chr10:70052600-70132934	0.0236533	1.44662	5.9345	up	0.0216656
FAR2	FAR2	chr12:29149002-29335616	0.0533448	3.42394	6.00417	up	0.000126037
GPM6B	GPM6B	chrX:13770942-13938712	0.0371434	2.63016	6.1459	up	8.66e-05
PRR26	PRR26	chr10:274189-689668	0.0639849	4.82541	6.23678	up	5.67e-07
